# Supplementary material for: A class-specific effect of dysmyelination on the excitability of hippocampal interneurons
Source: eLife. 2023 Oct 16;12:e86469. doi: 10.7554/eLife.86469 (PMC10617988; doi:10.7554/eLife.86469)
Supplement: Figure 1—source data 1. [file elife-86469-fig1-data1.xlsx]

## Sheet: Figure 1
Fig. 1I							1 doublet of paranodes= 2 paranodes				WT n=4 mice		at P70
				Paranode number/104 mm2							4.1B KO n=5 mice
				z-depth 10 µm
		Alveus	Alveus		SO	SO		SP	SP		SR	SR		SLM	SLM
		WT	4.1B KO		WT	4.1B KO		WT	4.1B KO		WT	4.1B KO		WT	4.1B KO
		584	498		92.3	46.4		108.7	54.7	SR	33.3	4.5		247.5	249.2
		550	592		52.1	76		56	49		16.9	0.7		245.7	139
		460	362		98.1	76		71.2	67		37.4	4.4		295.2	155.5
		362	430		79.5	29		91.5	45		17.7	6		261	387
Mean		489	470.5		80.5	55		81.85	53.7333		26.3	3.9		262.35	232.7
SEM		57.5	56.7		11.816	12.4		13.3154	3.06295		6.1	1.3		13.2442	65.7
Student's t test P			0.8002			0.1774			0.0667			0.006			0.6273
comparison with WT			t=0,2646, df=6			t=1,528, df=6			t=2,236, df=6			t=4,154, df=6			t=0,5114, df=6
	delta %		4			29			34			85			11
	Fig. 1J			n= 4-5 mice/genotype		at P70												Student's t test		∆%
	Myelin length mm/104 mm2			1 ROI/mouse								Mean			SEM			comparison with WT
	single confocal sections			WT1	WT2	WT3	WT4					WT	4.1B KO		WT	4.1B KO		P value
		SO	bin 1	543	625	427	565				bin 1	540	288		59	26		0.00175444	t=5,344, df=6	47
		SP	bin 2	652	605	751	605				bin 2	653	545		39.7391	113		0.3926	t=0,9110, df=7	17
		SR1	bin 3	450	368	463	484				bin 3	441	304		29.331	57		0.0623203	t=2,216, df=7	31
		SR2	bin 4	344	236	273	364				bin 4	304	75		34.6166	25		0.000404627	t=6,293, df=7	75
		SR3	bin 5	449	353	89	474				bin 5	341	32		101.653	7		0.00534157	t=3,977, df=7	90
		SR4	bin 6	409	293	371	278				bin 6	338	105		36.1398	62		0.0112823	t=3,411, df=7	69
		SR5	bin 7	561	371	736	498				bin 7	542	464		87.6692	171		0.657206	t=0,4667, df=6	14
			4.1B KO	KO1	KO2	KO3	KO4	KO5
		SO	bin 1	344	247	304		255
		SP	bin 2	454	416	747.66	817	291
		SR1	bin 3	434	134	328.28	364	260
		SR2	bin 4	110	59	8.4	136	62
		SR3	bin 5	22	22	49.19	46	23
		SR4	bin 6	97	15	312.06	94	8
		SR5	bin7	476	120		840	420
	Fig. 1-figure supplement 1				at P35
	stratum radiatum		n= 3 mice/genotype
		Myelin length mm/104 mm2			% of myelinated Lhx6-axons
		Control	Cntn2-/-		Control	Cntn2-/-	4.1B KO
		227.188	242.188		79	63	70.3
		229.062	249.062		79	78	67.5
		333.75	336.562		67	67	60.4
	Mean	263.333	275.938		75	69.3333	66.0667
	SEM	43.1263	37.2046		4.89898	5.49242	3.60855
Mann-Whitney test			P=0,4			P=0,3	P=0,3
comparison with WT			U=2			U=1.5	U=2
