# Supplementary material for: A class-specific effect of dysmyelination on the excitability of hippocampal interneurons
Source: eLife. 2023 Oct 16;12:e86469. doi: 10.7554/eLife.86469 (PMC10617988; doi:10.7554/eLife.86469)
Supplement: Figure 2—source data 1. [file elife-86469-fig2-data1.xlsx]

## Sheet: Figure 2
	Figure 2E and F													Fig. 2K							Fig. 2L						Fig. 2M
	density of PV and SST cells in the SO and SP of the CA1 hippocampus													total length of PV myelinated axons/105 µm2 in the stratum radiatum at P70								total length of myelinated SSTaxons in the SR						myelin coverage of SST axons crossing the SR (%)
	P35	n= 14-20 ROIs, 3 mice/genotype																				n=10 ROIs						axon with length>100 µm
														n=4-5 ROIs, 3 mice/genotype								n= 3 mice/genotype at P35						n= 3 mice/genotype at P35
		Neuron density/105 µm2												z-depth 5 µm								µm/ROI 105 µm2		z-depth 5-8µm
															WT	4.1B KO
	SST SO			SST SP			PV SO			PV SP					1081	265						WT	4.1B KO				WT	%	length SST axon (µm)		4.1B KO	%	length SST axon (µm)
	WT	4.1B KO		WT	4.1B KO		WT	4.1B KO		WT	4.1B KO				864	575						1057	495					52	267			45	313
	17.4	35.4		1.1	8.8		1.7	4.1		8.4	14.2				1248	203						914	310					72	98			56	215
	27	34		2.9	5.3		0.5	3.5		7.7	16				1727	881						1154	401					68	125			37	309
	28.1	34.5		2.6	2.7		2.5	1.7		6	7.1				1591							883	516					83	148			41	261
	25.6	30.1		1.8	0		2	0.6		8.3	4											636	231					100	107			36	251
	22.3	24.6		1.8	4.4		3	3.9		10.1	13.2			Mean	1302.2	481						966	608					97.1429	175			69	226
	21.3	34.5		1	5.4		1.3	7.2		9	14.9			SEM	178.141	180.363						1521	416					89.6	125			89	203
	28	27.4		4.8	2.6		3.4	1.2		9.6	12											705	400					67.6768	198			75	118
	22.7	40		1.2	4.9		0.5	5.7		10.8	15.8											1156	269					94.7826	115			44	319
	23.1	35.5		6.4	4.5		4.4	3.8		4	7.5			Mann-Whitney		P=0.0317						427	312					96.9697	165			36	152
	36.7	22.6		4	3.9		3.4	2.8		3.5	6.8			two-tailed		U=1												96.2687	134			22	237
	25.8	22.6		4.2	4.2			2.9		11.6742	9.1																	85.4369	206			16	118
	30.6031	30.2			5.6			2.7		14.7002	5.6										Mean	941.9	395.8					94.4444	180			33	213
	22.5772	27.7			4.9			3.4		19.1679	4.9										SEM	102.985	39.6577					74.0586	239			74	121
	32.8416	21.8			4.3			3.3		19.8394	6.5																	78.5388	219			46	210
	30.2245									18.5163																		92.3664	111			14	98
	39.8393									12.2897											Mann-Whitney		P<0.0001					95.1456	206			82	129
	27.7981									6.64308											two-tailed		U=3					73	264			59	198
	25.1626									10.126																		76	199			63	242
	45.4208									20.4737																		68	167			7	147
	37.2803									10.7591																		89	187			32	184
										12.635																		66	173			27	196
										11.0718																		100	188			14	194
																												91	204			39	144
																												100	281			16	147
Mean	28.4874	30.0643		2.89091	4.39286		2.27	3.34286		11.1498	9.82857																	35	188			38	110
																												31	135			44	218
SEM	1.60231	1.60228		0.556858	0.537963		0.434344	0.469636		1.05505	1.20268																	100	209			33	245
																												87	179			41	182
																												97	294
																												68	95
Student's t test		P=0,4927			P=0,0575			P=0,1078			P=0,4118																	31	120
comparison with WT																												100	169
		Two-tailed			Two-tailed			Two-tailed			Two-tailed																	72	95
		t=0,6956, df=32			t=2,000, df=23			t=1,676, df=22			t=0,8309, df=34																	67	127
																											Mean	79.6695	174.057			42.3448	196.552
																											SEM	3.36803	9.25054			4.0347	11.6484
																											SD	19.6388	53.9395			21.3496	61.6375
																											Mann-Whitney WT vs 4.1B KO
																											% myelin coverage				length of SST axons
																											P	<0,0001			0.1174
																											U	124			391
																											two-tailed
