# Supplementary material for: A class-specific effect of dysmyelination on the excitability of hippocampal interneurons
Source: eLife. 2023 Oct 16;12:e86469. doi: 10.7554/eLife.86469 (PMC10617988; doi:10.7554/eLife.86469)
Supplement: Figure 3—source data 1. [file elife-86469-fig3-data1.xlsx]

## Sheet: Figure 3
							Density of Olig2+ cells
Fig. 3E	Density of Olig2+ cells /area 10e5 µm2				CA1 hippocampus
	11-12 ROIs ; 3 mice/genotype at P35																Student's t test
	z-depth 14-20 µm																comparison with WT
	WT														Mean	SEM	P value	two-tailed		SD
	SO	41	46	38	38	57	30	27	38	11.8434	45.1613	26.4929			36.2271	3.63354				12.0511
	SP	40		51	31	75	64	63	66	37.2249	36.6972	48.5568	26.4089		48.9898	4.85757				16.1108
	SR	22	23	20	18	38	27	29	41	23.047	20.3252	22.7873	19.4961		25.3046	2.21143				7.33449
	SLM	44	50	41	38	57	39	38	47		61.8549		60.3522		57.5814	7.51385				9.28018
	4.1B KO
	SO	48	38	35	65	51	43	56	42	33.7431		32.9994	14.7689		41.7738	4.04313	0.3109	t=1,040, df=20		13.4095
	SP	53	42	38	47	51	55	57	46	35.7366	14.5419	10.8743	24.9066		39.5883	4.66867	0.1706	t=1,419, df=21		15.4842
	SR	23	20	24	27	25	24	30	29	17.3145	18.1249	14.8161	14.5462		22.2335	1.58371	0.2625	t=1,150, df=22		5.25256
	SLM	43	31	31	32	51	61	69	69		57.8871	47.2932	69.4711		55.3071	6.27019	0.4116	t=0,2488, df=22		15.4121
Fig. 3F	Density of Olig2+ cells /area 10e5 µm2				Dentate gyrus
	3 ROIs ; 3 mice/genotype at P35							Student's t test
								comparison with WT
	WT					Mean	SEM	P value
	hilus	50	51	40		47	4.33
	GL	10	8	9		9	0.74
	ML	23	24	27		25	1.36
	4.1B KO
	hilus	49	54	53		52	1.92	0.261722	t=1,306, df=4
	GL	9	9	11		10	0.62	0.491767	t=0,7559, df=4
	ML	26	17	31		25	4.84	>0,9999	t=0,000, df=4
