# Supplementary material for: A class-specific effect of dysmyelination on the excitability of hippocampal interneurons
Source: eLife. 2023 Oct 16;12:e86469. doi: 10.7554/eLife.86469 (PMC10617988; doi:10.7554/eLife.86469)
Supplement: Figure 4—source data 1. [file elife-86469-fig4-data1.xlsx]

## Sheet: Figure 4
																Control						4.1B KO
			Fig. 4B													ROI1	ROI2	ROI3	ROI4			ROI1	ROI2	ROI3	ROI4
			Internodal length													stack 36 µm	stack 32 µm	stack 23 µm	stack 56 µm			stack 50 µm	stack 58 µm	stack 52 µm	stack 50 µm
															1	21.17	9.13	13.5	14		1	10	8.26	9.87	5.62
			Lhx6,tdTomato mice at P70		z-depth 25-50 µm		4 ROIs from 2 mice/genotype								2	22.46	12.33	16.27	15.32		2	10.65	9.43	11.59	14.72
															3	22.89	12.86	16.93	16.12		3	11.58	12.59	11.8	17.32
				Distribution								µm	µm		4	23.05	15	17.3	16.83		4	11.79	15	14.38	17.6
			length (µm)	10 à 20	20 à 30	30 à 40	40 à 50	50 à 60	60-70	>70		mean length	max length		5	25.87	15.38	18.72	18.19		5	11.84	16.44	14.72	17.79
			control	0	0.19	0.302	0.27	0.095	0.095	0.063		44.49	115.2		6	25.91	15.43	19.87	18.31		6	13.72	16.71	15.44	17.89
				0.1	0.21	0.16	0.15	0.16	0.13	0.07		43.67	140.5		7	26.46	18.57	21.35	21.26		7	13.78	17.66	19.56	18.84
				0.12	0.17	0.17	0.21	0.19	0.06	0.08		43.06	103.5		8	26.68	20.81	22.5	22.34		8	13.84	18.53	19.99	18.95
				0.063	0.271	0.167	0.177	0.094	0.083	0.146		43.84	98.8		9	28.29	21.57	24.3	22.5		9	14.38	19.26	20.47	20.6
															10	29.38	22.43	24.38	22.55		10	14.51	20.96	20.81	21.68
															11	29.45	23.4	27.84	23.56		11	14.6	21.19	22.2	21.72
			4.1B KO	0.3	0.2	0.217	0.1	0.133	0	0.05		32.78	79.3		12	29.97	24.9	28.62	23.59		12	14.7	21.82	22.33	22.09
				0.155	0.19	0.207	0.172	0.121	0.069	0.086		42.15	141		13	30.76	26.59	29.21	23.72		13	14.7	21.84	24.8	22.79
				0.229	0.314	0.257	0.086	0.057	0.026	0.029		29.54	76		14	32.81	26.63	29.88	23.99		14	15.08	23.04	26.52	23.46
				0.211	0.368	0.184	0.079	0.053	0.031	0.079		33.44	78.7		15	33.59	27.08	30	24.21		15	15.91	23.5	27.72	24.66
															16	33.95	27.13	30.59	24.32		16	16.59	23.76	28.22	25.55
															17	34.17	27.94	31.21	25.06		17	18.27	24.14	28.33	26.62
															18	34.26	28.31	32.24	25.35		18	19.92	24.44	28.61	27.84
															19	34.34	29.12	33.3	25.68		19	20.28	25.58	28.77	28.12
		Mean	control	7.05906	21.0835	20.1377	20.1929	13.6369	9.2648	9.02188		43.77	114.5		20	34.52	29.5	33.44	26.22		20	21.66	29.16	30.67	28.38
			4.1B KO	22.3568	26.809	21.6229	10.9269	9.1	3.1	6.1		34.48	93.8		21	35.03	29.98	33.73	26.22		21	22.62	31.95	31.74	28.39
															22	35.08	31.58	34.68	26.53		22	23.15	32.71	31.82	29.85
		SEM	control	3.01907	2.45933	3.86314	2.99933	2.86951	1.84169	2.16723		0.34	10.8		23	35.74	32.32	38.66	27.01		23	23.68	32.73	32.16	32.64
			4.1B KO	3.45043	5.054	1.75955	2.4827	2.42488	1.64324	1.53843		3.11	18.2		24	36.03	32.91	39.38	27.05		24	23.88	33.16	32.89	33.19
															25	36.15	33.15	40.67	27.08		25	25.62	35.13	34.12	36.95
		SD	control									0.588019	18.6546		26	36.55	33.21	41.01	27.64		26	26.03	35.2	34.54	38.73
			4.1B KO									5.39148	31.5327		27	36.65	34.44	41.95	28.02		27	27.11	35.31	35.24	38.78
															28	37.57	34.71	42.8	28.03		28	27.14	35.64	37.83	39.79
	Mann-Whitney		P	0.0286	0.4	0.3429	0.0571	0.3429	0.0571	0.4857		0.0286			29	37.83	35.05	42.9	28.15		29	27.41	37.59	41.21	39.83
	two-tailed		U	0	4.5	4	1	4	1	5		1			30	37.89	35.27	45.76	29.16		30	29.56	37.92	43.68	41.91
															31	39.05	35.71	46.04	29.87		31	30.36	39	45.27	42.57
												Distribution			32	40.21	37.4	47.31	29.92		32	30.93	39.15	58.57	46.15
												Kolmogorov-Smirnov test			33	40.94	40.6	48.58	30.15		33	32.6	40.22	58.62	51.64
												P value		<0,0001	34	41.48	41.42	48.82	30.4		34	34.37	40.31	60.01	58.54
															35	43.76	41.42	49.02	31.3		35	35.07	40.88		63.98
												Kolmogorov-Smirnov D		0.2239	36	46.64	42.61	51.32	32.94		36	35.26	41.01		72.93
															37	47.07	42.96	52.26	33.35		37	36.02	45.05		73.96
															38	48	43.53	52.37	33.85		38	36.38	45.52		78.71
															39	48.8	44.37	54.65	34.05		39	37.07	46.2
															40	48.96	45.67	55.69	34.83		40	38.72	46.64
															41	49.15	45.95	55.98	35.28		41	38.79	47.89
															42	49.29	49.03	56.03	35.9		42	39.01	49.33
															43	49.42	50.32	56.27	36.19		43	39.66	51.28
															44	49.48	50.38	57.56	37.47		44	42.8	52.79
															45	49.56	50.55	58.57	37.74		45	43.89	53.11
															46	49.73	50.6	60.72	39		46	46.19	53.13
															47	49.93	52.54	63.75	39.11		47	46.78	53.29
															48	50.72	53.45	68.34	39.78		48	48.33	55.92
															49	51.25	53.93	74.18	40.77		49	48.95	56.16
															50	51.44	55.16	75.55	40.81		50	51.95	63.5
															51	57.62	55.65	99.79	41		51	52.23	64.34
															52	58.48	57.76	103.52	41.05		52	52.88	65.57
															53	58.56	58.9		41.74		53	55.32	65.67
															54	60.1	60.15		41.86		54	56.43	89.05
															55	62.12	60.56		42.64		55	56.49	93.52
															56	67.33	61.2		42.81		56	56.77	108.93
															57	67.37	61.3		43.65		57	59.46	115.03
															58	67.51	62.8		44.43		58	74.27	141.32
															59	69.81	64.34		45.27		59	76.74
															60	70.71	65.71		45.8		60	79.33
															61	79.35	68.54		46.27
															62	79.39	68.71		46.28
															63	115.17	74		46.41
															64		79.05		47.2
															65		84.79		49.28
															66		107.92		50.31
															67		140.46		51.19
															68				51.46
															69				52.78
															70				56.67
															71				57.14
															72				57.31
															73				58.23
															74				58.36
															75				60.18
															76				61.01
															77				61.34
															78				63.41
															79				63.77
															80				64.81
															81				66.05
															82				68.73
															83				70.46
															84				71.69
															85				73.98
															86				77.14
															87				78.35
															88				78.83
															89				79.18
															90				79.49
															91				80.31
															92				82.08
															93				85.11
															94				86.23
															95				87.41
															96				98.92
															mean	44.4905	43.6742	43.0637	43.8369		30.5	32.7842	42.1459	29.5441	33.4416
