# Supplementary material for: A class-specific effect of dysmyelination on the excitability of hippocampal interneurons
Source: eLife. 2023 Oct 16;12:e86469. doi: 10.7554/eLife.86469 (PMC10617988; doi:10.7554/eLife.86469)
Supplement: Figure 5—source data 1. [file elife-86469-fig5-data1.xlsx]

## Sheet: Figure 5
	Fig. 5D	Distribution as percentages				nodal length (µm)		panNav immunostaining		Fig 5J	nodal length (µm)		panNav immunostaining
	nodal length	Nodal length				Lhx6-positive axons in CA1					Lhx6-positive axons in CA1							Fig. 5I	Gap between Nav cluster and paranode
		Nav P30	Nav P70								P70
	<1 µm	17	30								nodal length			heminode length					Lhx6-positive axons in CA1			2 mice/genotype
	1 - 2 µm	39	48																P70
	2 - 3 µm	17	9			P30		P70			control	4.1B KO		control	4.1B KO				control	4.1B KO		control	4.1B KO
	3 - 4 µm	10	2		1	0.64		0.31			0.31	1.38		1.41	1.54				heminode	heminode		node	node
	> 4 µm	17	11		2	0.8		0.49			0.49	5.78		1.69	1.93				0	4.3		0	0.8
		n=41	n=64		3	0.91		0.5			0.5	3.35		1.51	1.5				0	2.6		0.3	0
					4	0.95		0.55			0.55	1.59		1.84	1.8				0	1		0.4	3.4
					5	0.96		0.6			0.6	1		5.03	2.28				0.2	0		0.5	2.9
					6	0.96		0.6			0.6	1.32		0.89	1.87				0	1.3		0	0.5
					7	0.99		0.6			0.6	1.12		1.78	1				0	2		0.3	0.4
					8	1		0.6			0.6	5.35		1.03	1.55				0	0		0.5	0
					9	1		0.64			0.64	1.51		3.2	2.02				0	3.1		0.3	0
					10	1.05		0.7			0.7	1.58		2	2.73				0	1.5		0.2	0.5
					11	1.1		0.7			0.7	1.38		0.8	1.89				0	2.7		0	0.5
	Distribution				12	1.26		0.7			0.7	1.21		1.5	1.67				0	3.2		0	0.8
	P30 vs P70				13	1.26		0.7			0.7	2.33		1.57	1.56				0	2.5		0	0.8
					14	1.27		0.75			0.75	1.4		3.2	1.56				0.3	0		0
	Kolmogorov-Smirnov test				15	1.32		0.8			0.8	1.15		2	1.19				0	0.6		0
	P value			0.0264	16	1.38		0.85			0.85	2.65			2.61				0	0		0.2
	Kolmogorov-Smirnov D			0.2942	17	1.4		0.9			0.9	1.23			2.57				0.2	9.7		0
					18	1.4		0.95			0.95	1.95							0	3.6		0.2
					19	1.41		0.97			0.97	1.23							0	1		0
					20	1.43		1			1	2.6							0	0		0
					21	1.49		1			1	1.05							0	0		0
					22	1.5		1			1	1.4							0.2	1.4
					23	1.72		1			1	1.07							0	2.2
					24	2.05		1			1	1.77							0	0
					25	2.05		1			1	2.5							0.3	2.7
					26	2.09		1.03			1.03	1.07							0	3.5
					27	2.25		1.1			1.1								0	9.6
					28	2.27		1.1			1.1								0
					29	2.39		1.1			1.1
					30	2.9		1.12			1.12							Mean	0.0444444	2.25		0.145	0.883333
					31	3.12		1.14			1.14							SEM	0.0191021	0.510474		0.0417584	0.333237
					32	3.21		1.2			1.2							SD	0.0974022	2.55237
					33	3.22		1.2			1.2								n=26	n=25
					34	3.36		1.2			1.2
					35	4.39		1.2			1.2							Mann-Whitney		P<0.0001			P=0.0029
					36	4.65		1.22			1.22							two-tailed		U=112			U=49
					37	4.65		1.3			1.3
					38	5.41		1.3			1.3
					39	5.75		1.3			1.3
					40	5.75		1.35			1.35
					41	6.15		1.35			1.35
					42			1.4			1.4
					43			1.4			1.4
					44			1.4			1.4
					45			1.4			1.4
					46			1.5			1.5
					47			1.6			1.6
					48			1.87			1.87
					49			1.9			1.9
					50			1.9			1.9
					51			2.1			2.1
					52			2.2			2.2
					53			2.2			2.2
					54			2.5			2.5
					55			2.85			2.85
					56			2.87			2.87
					57			3.9			3.9
					58			4.2			4.2
					59			4.5			4.5
					60			4.5			4.5
					61			4.95			4.95
					62			6			6
					63			6.2			6.2
					64			7			7
											1.3
											0.72
						n=41		n=64			1.03
											1.35
											1.12
											1.3
											1.89
											1.35
											0.86
											1.1
											1.07
											0.89
											1.06
											2.25
											0.98
											1.21
											2.51
											1.2
											1.42
											1.38
											1.1
											1.37
											1.44
											nodal length			heminode length
											control	4.1B KO		control	4.1B KO
										Mean	1.59	1.92192		1.96333	1.83941
										SEM	0.142178	0.246078		0.293179	0.1212
										SD	1.28748	1.23039		1.09697	0.4848
										Mann-Whitney		P=0.0068		Mann Whitney test		P= 0.427
												Two-tailed				Two-tailed
												U=738				U=98.5
