# Supplementary material for: A class-specific effect of dysmyelination on the excitability of hippocampal interneurons
Source: eLife. 2023 Oct 16;12:e86469. doi: 10.7554/eLife.86469 (PMC10617988; doi:10.7554/eLife.86469)
Supplement: Figure 6—source data 1. [file elife-86469-fig6-data1.xlsx]

## Sheet: Figure 6
	Fig. 6C		Juxtaparanodal clustering of Kv1 channels				P70
			in PV axons
			% of Caspr-positive paranodes with Kv1.2 clustering
			7-15 ROIs	3 mice/genotype
			PV axons
				WT	Cntn2-/-	WT	Cntnap2-/-	WT	4.1B KO
				39	29	57	41	63	17
				44	40	67	34	50	30
				57	42	58	43	65	35
				52	31	79	22	57	33
				60	50	67	32	54	29
				59	36	75	32	45	21
				71	27	66	17	64	20
				69	40	64		44	21
				73	50	75		74	15
				61	52	69		50	11
				56	54				18
				51	39
				69	53
				59	29
					44
			Means	59	41	68	32	57	23
			SEM	2.76648	2.49585	2.3885	3.83592	3.25159	2.47827
			SD	9.97469	9.3386	7.1655	9.39605	9.75477	7.83698
			Mann-Whitney		P<0.0001		P=0.0001		P<0.0001
		WT vs Cntn2-/-				WT vs Cntnap2-/-				WT vs 4.1B KO
		Mann Whitney test				Mann Whitney test				Mann Whitney test
		P value		<0,0001		P value		0.0001		P value		<0,0001
		Two-tailed				Two-tailed				Two-tailed
		Mann-Whitney U		20.5		Mann-Whitney U		0		Mann-Whitney U		0
