# Supplementary material for: A class-specific effect of dysmyelination on the excitability of hippocampal interneurons
Source: eLife. 2023 Oct 16;12:e86469. doi: 10.7554/eLife.86469 (PMC10617988; doi:10.7554/eLife.86469)
Supplement: Figure 7—source data 1. [file elife-86469-fig7-data1.xlsx]

## Sheet: Figure 7 + Tables 1
	Fast-spiking Lhx6+ cells		stratum pyramidale			Control = 9 mice KO = 6 mice
Figure 7C
	(pA)	control								mean	SEM
F/I curve	0	0	0	0	0	0	0	0	0	0	0
	100	22	62	40	64	28	35	108	16	46.875	10.6694
	200	42	110	66	80	82	75	176	50	85.125	14.9253
	300	74	144	84	98	54	89	201	68	101.5	17.0692
	400	96	162	88	98	98	98	220	86	118.25	16.8753
	(pA)	4.1B KO						mean	SEM				test	2 way ANOVA
	0	0	0	0	0	0	0	0	0				P value	0.4128
	100	32	78	54	43	32	48	47.8333	7.00674				F	F (1,60) = 0.6801
	200	92	126	106	79	56	77	89.3333	9.99889
	300	138	154	138	109	74	92	117.5	12.6326
	400	164	146	154	124	88	103	129.833	12.2703
Figure 7D					Figure 7E					Figure 7F					Figure 7G
	Vrest (mV)	control	4.1B KO			Rinput (MΩ)	control	4.1B KO			Rheobase (pA)	control	4.1B KO			AHP area (mV.ms)	control	4.1B KO
		-50	-72				287	425				60	20				-535.93	-446.45
		-60	-64				470	422				20	25				-220.16	-338.16
		-40	-70				189	269				60	60				-38.64	-168.14
		-70	-58				254	185				40	10				-268.14	-187.49
		-62	-61				657	483				20	20				-195.19	-529.89
		-57	-57				494	374				40	30				-38.01	-352.81
		-60	-53				296	183				30	20				-19.75	-160.48
		-70	-56				402	373				30	20				-111.428	-289.17
		-50	-56				192	508				30	13				-241.296	-106.122
			-58					240					70					-188.21
	mean	-57.67	-60.5			mean	360.11	346.2			mean	36.67	28.8			mean	-185.39	-276.69
	SEM	3.26	1.99			SEM	52.46	37.77			SEM	5	6.33			SEM	54.05	42.71
	test	Mann-Whitney				test	Mann-Whitney				test	Mann-Whitney				test	Mann-Whitney
	P value	n.s. 0.6748				P value	n.s. 0.8421				P value	n.s. 0.1305				P value	n.s. 0.2775
	U	39.5				U	42				U	26.5				U	31
	two-tailed					two-tailed					two-tailed					two-tailed
Table 1
	Vrest (mV)	see above	Figure 7D
	Rinput (MΩ)	see above	Figure 7E
	Rheobase (pA)	see above	Figure 7F
	AHP area (mV.ms)	see above	Figure 7G
	Amplitude (mV)	control	4.1B KO		Area (mV.s)	control	4.1B KO		Half-width (ms)	control	4.1B KO		Threshold (mV)	control	4.1B KO		AHP peak (mV)	control	4.1B KO
		62.9	55.85			49.12	44.81			0.8	0.7			-42.54	-48.97			-13.52	-12.95
		43.09	44.63			47.62	46.81			0.98	0.98			-51.44	-44.68			-6.73	-8.77
		62.96	51.15			67.84	43.56			1.05	0.75			-57.4	-38.54			-3.72	-8.61
		60.46	58.5			71.72	63.84			1.15	1			-40.77	-38.97			-8.88	-8.82
		77.55	60.55			81.9	60.23			0.95	0.95			-47.79	-46.17			-13.15	-13.7
		55.18	66.9			75.23	88.65			1.2	1.3			-42.51	-49.81			-6.47	-9.03
		64.04	48.31			65.08	62.45			0.95	1.2			-53.32	-54.54			-5.19	-6.87
		48.492	55.85			26.616	56.39			0.5	0.95			-35.919	-49.96			-14.832	-9.09
		69.153	73.608			43.069	62.378			0.7	0.85			-49.438	-53.04			-20.691	-10.071
			50.11				35.27				0.75				-41.35				-18.59
	mean	60.42	56.54		mean	58.69	56.44		mean	0.92	0.94		mean	-46.79	-46.6		mean	-10.35	-10.65
	SEM	3.47	2.79		SEM	6	4.74		SEM	0.07	0.06		SEM	2.28	1.78		SEM	1.85	1.1
	test	Mann-Whitney			test	Mann-Whitney			test	Mann-Whitney			test	Mann-Whitney			test	Mann-Whitney
	P value	n.s. 0.3882			P value	n.s. 0.4967			P value	n.s. 0.9838			P value	n.s. 0.9682			P value	n.s. 0.6607
	U	34			U	36			U	44.5			U	44			U	39
	two-tailed				two-tailed				two-tailed				two-tailed				two-tailed
