# Supplementary material for: A class-specific effect of dysmyelination on the excitability of hippocampal interneurons
Source: eLife. 2023 Oct 16;12:e86469. doi: 10.7554/eLife.86469 (PMC10617988; doi:10.7554/eLife.86469)
Supplement: Figure 7—source data 2. [file elife-86469-fig7-data2.xlsx]

## Sheet: Figure 7 + Tables 1-2
Figure 7J	Lhx6+ cells stratum oriens			Control = 9 mice KO = 8 mice
	(pA)	control												mean	SEM
	0	0	0	0	0	0	0	0	0	0	0	0	0	0	0
F/I curve	10	0	0	4	0	0	0	0	0	0	0	0	0	0.333333	0.333333
	20	0	2	8	0	0	0	0	3	0	0	0	2	1.25	0.686725
	30	0	10	12	8	0	0	0	6	3	0	0	5	3.66667	1.28118
	40	0	14	18	10	0	6	0	10	6	0	1	7	6	1.7624
	50	4	18	24	16	6	8	0	17	8	16	5	8	10.8333	2.06278
	60	4	20	26	18	6	6	0	21	9	22	7	10	12.4167	2.45091
	70	12	20	32	20	8	14	0	25	10	26	10	11	15.6667	2.61793
	80	24	22	34	22	8	24	1	27	12	28	11	11	18.6667	2.832
	90	28	22	38	24	10	28	2	29	13	32	13	11	20.8333	3.12815
	100	36	22	42	26	12	30	5	27	13	36	15	13	23.0833	3.35175
	110	38	24	44	26	14	32	7	33	15	38	15	13	24.9167	3.48472
	120	40	24	48	28	16	38	14	34	16	42	16	13	27.4167	3.63163
	130	42	24	50	30	16	36	17	37	16	44	17	13	28.5	3.74672
	(pA)	4.1B KO																mean	SEM	P value		test	2 way ANOVA
	0	0	0	0	0	0	0	0	0	0	0	0	0	0	0	0	0	0	0			P value	****<0.0001
	10	0	0	0	0	0	0	0	0	0	0	0	0	0	0	0	0	0	0			F	F (1, 364) = 49.08
	20	0	0	2	0	0	0	0	4	0	0	0	0	0	0	0	0	0.375	0.271953
	30	2	0	16	0	0	0	0	8	0	0	0	0	0	4	0	0	1.875	1.08733
	40	0	0	16	0	2	4	4	6	0	4	0	0	0	8	0	0	2.75	1.09354
	50	6	0	22	0	4	4	10	12	0	8	2	0	4	13	0	1	5.375	1.56491
	60	12	0	24	2	4	6	12	12	0	10	6	0	8	16	0	3	7.1875	1.7108
	70	14	2	28	0	2	8	14	15	4	10	8	0	10	20	1	6	8.875	1.96824
	80	26	10	30	2	6	8	16	17	8	12	10	0	12	23	2	8	11.875	2.15808
	90	30	6	28	4	6	12	20	19	8	14	10	0	12	26	3	10	13	2.29311
	100	32	12	28	4	8	12	24	17	10	14	12	1	14	28	3	11	14.375	2.31458	*0.0375
	110	30	14	24	6	8	14	24	23	12	16	12	3	14	30	4	13	15.4375	2.13496	*0.0176
	120	28	11	16	14	12	16	24	25	12	16	14	3	16	32	5	14	16.125	1.94052	**0.0022
	130	32	24	34	8	10	16	26	25	14	18	16	4	16	35	7	15	18.75	2.41437	*0.014
Figure 7K						Figure 7L						Figure 7M						Figure 7N
	Vrest (mV)	control	4.1B KO				Rinput (MΩ)	control	4.1B KO				Rheobase (pA)	control	4.1B KO				AHP area (mV.ms)	control	4.1B KO
		-50	-50					388	148					50	30					-473.23	-274.34
		-65	-50					308	227					20	70					-57.47	-329.23
		-70	-55					177	374					50	20					-145.71	-756.43
		-58	-50					386	217					10	70					-619.92	-333.88
		-50	-50					490	129					30	40					-236.33	-205.48
		-70	-50					370	280					40	40					-643.07	-227.75
		-80	-60					166	298					85	40					-138.54	-721.56
		-50	-52					410	257					27	20					-425.75	-410.62
		-55	-57					400	343					33	70					-630.8	-660.43
		-75	-70					335	329					50	40					-287.34	-744.59
		-63	-58					344	248					44	50					-297.68	-302.17
		-60	-58					514	295					20	100					-259.6	-454.3
			-63						236						60						-587.87
			-65						399						50						-866.81
			-70						474						30						-796.25
			-60						260						95						-670.23
			-61						228						70						-610.02
	mean	-62.1667	-57.5882				mean	357.333	278.941				mean	38.25	52.6471				mean	-351.286	-526.586
	SEM	2.93148	1.65302				SEM	30.2999	21.1187				SEM	5.72905	5.79034				SEM	58.9916	53.4968
	test	Mann-Whitney					test	Mann-Whitney					test	Mann-Whitney					test	Mann-Whitney
	P value	n.s. 0.2527					P value	*0.0236					P value	n.s. 0.1221					P value	*0.038
	U	76					U	51					U	67					U	55
	two-tailed						two-tailed						two-tailed						two-tailed
Table 2
	Vrest (mV)	see above	Figure 7K
	Rinput (MΩ)	see above	Figure 7L
	Rheobase (pA)	see above	Figure 7M
	AHP area (mV.ms)	see above	Figure 7N
	Amplitude (mV)	control	4.1B KO		Area (mV.s)	control	4.1B KO		Half-width (ms)	control	4.1B KO		Threshold (mV)	control	4.1B KO		AHP peak (mV)	control	4.1B KO
		62.39	64.42			51.04	69.96			0.78	1.05			-37.54	-38.48			-19.42	-14.53
		62.44	56.81			239.92	51.41			3.65	0.83			-35.07	-47.2			-3.63	-16.25
		72.83	74.14			190.55	72.71			2.08	0.98			-44.71	-45.96			-2.5	-22.72
		51.3	58.62			49.07	61.35			0.9	1			-44.66	-52.61			-16.66	-17.52
		62.96	60.26			80.28	93.75			1.25	1.53			-54.54	-54.28			-8.33	-7.78
		69.79	76.17			55.93	142.35			0.8	1.9			-52.55	-44.83			-16.75	-7.17
		69.47	71.73			95.18	76.02			1.33	1.08			-53.04	-42.18			-9.25	-22.45
		71.19	58.59			99.08	98.96			1.37	1.63			-47.85	-48.57			-12.08	-11.47
		60.22	50.39			105.52	104.45			1.7	2.05			-41.26	-40.62			-17.41	-18.04
		73.46	68.94			63.55	143.56			0.8	2.1			-44.25	-43.37			-15.08	-20.14
		62.85	54.44			126.89	190.25			2.03	3.35			-41.24	-45.29			-21.5	-9.19
		65.22	55.22			180.23	134.31			2.65	2.35			-51.53	-37.08			-8.16	-13.05
			73.79				85.61				1.1				-46.84				-15.47
			66.32				118.25				1.8				-29.63				-22.4
			70.8				79.21				1.05				-41.18				-22.63
			58.43				120.95				2.08				-38.8				-18.19
			69.99				138.45				1.93				-45.14				-17.07
	mean	65.343	64.0627		mean	111.437	104.796		mean	1.61042	1.63382		mean	-45.6856	-43.6499		mean	-12.5656	-16.239
	SEM	1.8391	1.94497		SEM	17.8739	8.92826		SEM	0.253017	0.160628		SEM	1.82996	1.43488		SEM	1.78724	1.24919
	test	Mann-Whitney			test	Mann-Whitney			test	Mann-Whitney			test	Mann-Whitney			test	Mann-Whitney
	P value	n.s. 0.6788			P value	n.s. 0.8788			P value	n.s. 0.5929			P value	n.s. 0.5558			P value	n.s. 0.1280
	U	92			U	98			U	89.5			U	88			U	67
	two-tailed				two-tailed				two-tailed				two-tailed				two-tailed
