# Supplementary material for: A class-specific effect of dysmyelination on the excitability of hippocampal interneurons
Source: eLife. 2023 Oct 16;12:e86469. doi: 10.7554/eLife.86469 (PMC10617988; doi:10.7554/eLife.86469)
Supplement: Figure 8—source data 1. [file elife-86469-fig8-data1.xlsx]

## Sheet: Figure 8
			P35		P35	3 mice/genotype
			3 mice/genotype		Fig. 8F			Fig. 8G
					AIS length			AIS onset
					µm			µm
					WT	4.1B KO		WT	4.1B KO
					22	23		3	4
					27	20			6
					26	20		4	6
					25	24		4	4
					28	23		1	7
					27	21		5	3
					22	25		3	2
					19	20		4	5
					23	16		6	2
					24	21		3	4
					24	24		6	4
					22	21		6	3
					28	23		7	2
					28	24		3	5
					28	20		5	4
					26	23		3	3
					25	23		1	4
					28	21		3	7
					25	27		3	3
					26	27		6	2
					32	22		3	5
					25	24		5	2
					24	24		5	5
					29	20		5	3
					19	19		12	4
					23	19		5	3
					28	18		3	2
					30	22		2	4
					21	21		2	4
					24	23		3	2
					25			3
			Means		25.26	21.93		4.13	3.8
			SEM		0.566371	0.462381		0.395531	0.272972
			SD		3.05	2.49		2.13	1.47
			Mann-Whitney			<0.0001			P=0.6509
			two-tailed			U=182			U=419.5
