# Supplementary material for: A class-specific effect of dysmyelination on the excitability of hippocampal interneurons
Source: eLife. 2023 Oct 16;12:e86469. doi: 10.7554/eLife.86469 (PMC10617988; doi:10.7554/eLife.86469)
Supplement: Figure 9—source data 1. [file elife-86469-fig9-data1.xlsx]

## Sheet: Figure 9
Figure 9C
sIPSCs	Amplitude (pA)	Control	4.1B KO
		33.25	47.72
		31.94	36.96
		33.63	54.26
		31.4	50.74
		28.23	44.07
		30.59	39.95
	mean	31.5075	45.6141
	SEM	0.878028	2.93151
	test	Mann-Whitney
	P value	**0.0022
	U	0
	two-tailed
sIPSCs	Frequency (Hz)	Control	4.1B KO
		0.86	4.8
		0.61	8.23
		1.16	5.01
		7.18	1.15
		2.83	5.84
		3.93	4.81
	mean	2.76204	4.97222
	SEM	1.12545	1.02034
	test	Mann-Whitney
	P value	n.s. 0.132
	U	8
	two-tailed
Figure 9D		Cumulative probability for the amplitude of sIPSCs
		Control							4.1B KO
		15.3809	15.625	15.0146	15.0146	15.0146	15.0146		15.0146	15.0146	15.1367	15.0146	15.3809	15.0146	P value	****<0.0001
		15.625	16.2354	15.0146	15.0146	15.0146	15.0146		15.1367	15.0146	15.1367	15.1367	15.5029	15.0146	Kolmogorov-Smirnov D	0.2656
		15.686	16.8457	15.0146	15.0146	15.0146	15.0146		15.1367	15.0146	15.1367	15.1367	15.625	15.1367
		15.7471	16.8457	15.0146	15.0146	15.0146	15.0146		15.2588	15.0146	15.2588	15.1367	16.7236	15.1367
		16.0522	17.1509	15.0146	15.0146	15.0146	15.0146		15.3809	15.0146	15.2588	15.3809	16.9678	15.2588
		16.1133	17.395	15.1367	15.0146	15.0146	15.0146		15.3809	15.1367	15.2588	15.3809	16.9678	15.2588
		16.1743	17.4561	15.1367	15.0146	15.1367	15.1367		15.5029	15.2588	15.5029	15.5029	17.7002	15.3809
		16.4795	17.5781	15.3809	15.0146	15.1367	15.1367		15.5029	15.2588	15.5029	15.5029	17.8223	15.3809
		16.5405	17.5781	15.3809	15.1367	15.1367	15.1367		15.5029	15.2588	15.625	15.5029	17.9443	15.5029
		16.5405	18.0054	15.3809	15.1367	15.1367	15.1367		15.625	15.2588	15.7471	15.625	18.0664	15.5029
		16.7236	18.7988	15.3809	15.1367	15.1367	15.1367		15.625	15.2588	15.7471	15.625	18.0664	15.5029
		16.7236	18.7988	15.5029	15.1367	15.1367	15.1367		15.7471	15.3809	15.8691	15.7471	19.043	15.5029
		16.8457	18.8599	15.5029	15.1367	15.1367	15.2588		15.7471	15.3809	15.9912	15.7471	19.2871	15.625
		16.8457	18.9209	15.625	15.1367	15.2588	15.2588		15.7471	15.3809	15.9912	15.8691	19.4092	15.625
		17.1509	19.043	15.625	15.1367	15.2588	15.3809		15.8691	15.3809	16.3574	15.9912	20.9961	15.7471
		17.2119	19.104	15.7471	15.1367	15.2588	15.5029		15.8691	15.3809	16.6016	15.9912	21.2402	15.7471
		17.395	19.165	15.8691	15.1367	15.2588	15.5029		15.9912	15.3809	16.6016	15.9912	21.2402	15.7471
		17.4561	19.7143	15.8691	15.1367	15.2588	15.5029		15.9912	15.3809	16.7236	16.2354	21.4844	15.9912
		17.8223	19.8364	15.9912	15.2588	15.3809	15.5029		16.1133	15.5029	16.8457	16.2354	21.6064	15.9912
		17.8833	19.8975	15.9912	15.2588	15.3809	15.625		16.2354	15.5029	16.8457	16.3574	21.7285	15.9912
		17.9443	20.1416	15.9912	15.2588	15.3809	15.625		16.4795	15.5029	16.9678	16.3574	21.9727	15.9912
		18.0054	20.2026	15.9912	15.2588	15.3809	15.625		16.4795	15.5029	17.0898	16.4795	22.0947	15.9912
		18.2495	20.6909	15.9912	15.2588	15.3809	15.7471		16.4795	15.5029	17.0898	16.6016	22.4609	15.9912
		18.5547	20.874	16.1133	15.2588	15.3809	15.7471		16.4795	15.625	17.2119	16.6016	22.7051	16.1133
		18.6157	20.874	16.1133	15.3809	15.3809	15.7471		16.4795	15.7471	17.2119	16.7236	23.0713	16.1133
		18.6157	20.874	16.2354	15.3809	15.3809	15.8691		16.6016	15.7471	17.334	16.7236	23.1934	16.2354
		18.7988	20.874	16.2354	15.3809	15.5029	15.8691		16.7236	15.7471	17.8223	16.8457	23.3154	16.2354
		18.7988	20.9961	16.3574	15.3809	15.5029	15.8691		16.7236	15.7471	17.9443	16.8457	23.3154	16.2354
		18.7988	21.7895	16.3574	15.5029	15.5029	15.8691		16.8457	15.7471	18.0664	16.8457	23.3154	16.3574
		18.9209	21.9727	16.3574	15.5029	15.5029	15.8691		16.8457	15.7471	18.1885	16.8457	23.6816	16.4795
		19.104	22.0337	16.3574	15.5029	15.5029	15.9912		17.2119	15.7471	18.1885	16.9678	23.8037	16.4795
		19.2871	22.0947	16.3574	15.5029	15.5029	15.9912		17.334	15.7471	18.1885	16.9678	24.1699	16.4795
		19.3481	22.2778	16.4795	15.5029	15.5029	16.1133		17.334	15.8691	18.3105	16.9678	24.292	16.6016
		19.6533	22.3389	16.4795	15.5029	15.5029	16.1133		17.4561	15.8691	18.3105	16.9678	24.292	16.6016
		19.7143	22.3999	16.4795	15.5029	15.5029	16.1133		17.5781	15.8691	18.4326	17.0898	24.292	16.7236
		19.7754	22.583	16.4795	15.5029	15.5029	16.1133		17.5781	15.8691	18.5547	17.0898	24.4141	16.7236
		19.8364	22.7661	16.7236	15.625	15.5029	16.1133		17.5781	15.9912	18.5547	17.0898	24.5361	16.7236
		20.2637	22.8271	16.7236	15.625	15.5029	16.1133		17.5781	15.9912	18.5547	17.0898	24.7803	16.7236
		20.3247	23.0713	16.8457	15.625	15.625	16.1133		17.9443	15.9912	18.5547	17.334	25.0244	16.7236
		20.3857	23.1323	16.8457	15.625	15.625	16.1133		18.1885	15.9912	18.5547	17.334	25.1465	16.8457
		20.3857	23.2544	16.8457	15.625	15.625	16.2354		18.1885	15.9912	18.6768	17.334	25.2686	16.8457
		20.6909	23.4985	16.9678	15.625	15.625	16.2354		18.3105	15.9912	18.6768	17.334	25.5127	16.8457
		21.0571	23.5596	16.9678	15.625	15.625	16.2354		18.3105	16.1133	18.6768	17.334	25.5127	16.8457
		21.2402	23.6816	17.0898	15.625	15.625	16.3574		18.3105	16.1133	19.043	17.334	25.6348	16.8457
		21.3623	23.9258	17.0898	15.625	15.625	16.3574		18.3105	16.1133	19.165	17.4561	25.7568	16.9678
		21.3623	24.0479	17.0898	15.625	15.625	16.4795		18.4326	16.1133	19.165	17.5781	25.7568	17.2119
		21.4233	24.1699	17.2119	15.625	15.7471	16.4795		18.4326	16.1133	19.2871	17.7002	25.8789	17.2119
		21.8506	24.1699	17.2119	15.625	15.7471	16.4795		18.4326	16.1133	19.2871	17.7002	26.001	17.2119
		21.9116	24.7803	17.334	15.7471	15.7471	16.4795		18.5547	16.1133	19.2871	17.7002	26.2451	17.334
		21.9116	26.1841	17.334	15.7471	15.7471	16.4795		18.5547	16.1133	19.4092	17.8223	26.3672	17.334
		21.9727	26.3061	17.5781	15.7471	15.7471	16.4795		18.5547	16.2354	19.4092	17.9443	26.3672	17.334
		22.0947	26.3061	17.7002	15.7471	15.7471	16.4795		18.5547	16.2354	19.4092	17.9443	26.6113	17.334
		22.1558	26.3672	17.7002	15.7471	15.8691	16.4795		18.5547	16.2354	19.5312	17.9443	26.9775	17.334
		22.2168	26.4282	17.7002	15.7471	15.8691	16.4795		18.6768	16.2354	19.5312	18.0664	27.2217	17.4561
		22.3999	26.6724	17.7002	15.7471	15.8691	16.6016		18.6768	16.2354	19.6533	18.0664	27.71	17.4561
		22.7051	26.9165	17.9443	15.7471	15.8691	16.6016		18.6768	16.2354	19.6533	18.0664	29.541	17.4561
		22.8882	27.2827	17.9443	15.7471	15.8691	16.6016		18.7988	16.2354	19.8975	18.1885	30.0293	17.5781
		22.9492	27.771	18.0664	15.7471	15.9912	16.6016		18.7988	16.2354	20.0195	18.1885	30.0293	17.5781
		23.1323	27.832	18.1885	15.7471	15.9912	16.6016		18.9209	16.2354	20.0195	18.1885	30.5176	17.5781
		23.1934	27.832	18.3105	15.7471	15.9912	16.7236		18.9209	16.3574	20.0195	18.1885	31.1279	17.5781
		23.2544	28.0151	18.3105	15.7471	15.9912	16.7236		18.9209	16.3574	20.0195	18.1885	31.1279	17.5781
		23.4375	28.2593	18.4326	15.7471	15.9912	16.7236		18.9209	16.4795	20.1416	18.3105	31.25	17.7002
		23.6816	28.4424	18.4326	15.8691	15.9912	16.7236		19.043	16.4795	20.1416	18.3105	31.3721	17.9443
		23.8037	28.5034	18.5547	15.8691	16.1133	16.8457		19.165	16.4795	20.1416	18.4326	31.4941	17.9443
		23.8037	28.6255	18.6768	15.8691	16.1133	16.8457		19.165	16.4795	20.1416	18.4326	31.6162	18.0664
		23.9258	28.6865	18.6768	15.8691	16.1133	16.8457		19.165	16.4795	20.2637	18.4326	32.1045	18.1885
		24.0479	28.8696	18.6768	15.8691	16.1133	16.8457		19.165	16.6016	20.2637	18.4326	32.4707	18.1885
		24.1089	28.9307	18.7988	15.9912	16.1133	16.8457		19.165	16.7236	20.3857	18.5547	32.5928	18.1885
		24.292	29.0527	18.9209	15.9912	16.2354	16.8457		19.165	16.7236	20.3857	18.5547	32.7148	18.3105
		24.4141	29.2969	18.9209	15.9912	16.2354	16.9678		19.2871	16.7236	20.3857	18.6768	32.8369	18.3105
		24.4141	29.4189	19.043	15.9912	16.2354	16.9678		19.4092	16.7236	20.5078	18.6768	32.8369	18.3105
		24.5361	29.7852	19.043	15.9912	16.2354	16.9678		19.4092	16.8457	20.5078	18.6768	33.4473	18.3105
		24.5361	29.9072	19.4092	15.9912	16.2354	16.9678		19.5312	16.8457	20.5078	18.6768	33.6914	18.4326
		24.9634	30.0293	19.4092	16.1133	16.2354	16.9678		19.5312	16.9678	20.6299	18.6768	33.8135	18.4326
		25.1465	30.0903	19.6533	16.1133	16.2354	17.0898		19.6533	16.9678	20.6299	18.6768	34.668	18.4326
		25.6348	31.189	19.8975	16.1133	16.2354	17.0898		19.6533	16.9678	20.6299	18.7988	34.668	18.5547
		25.8179	31.25	19.8975	16.2354	16.2354	17.0898		19.6533	16.9678	20.6299	18.7988	34.79	18.5547
		25.8179	31.9824	20.0195	16.2354	16.3574	17.0898		19.8975	17.0898	20.752	18.9209	36.2549	18.5547
		25.8789	32.8369	20.1416	16.2354	16.3574	17.0898		19.8975	17.0898	20.752	18.9209	37.2314	18.5547
		25.8789	33.1421	20.1416	16.2354	16.3574	17.0898		20.0195	17.0898	20.752	18.9209	37.4756	18.6768
		25.9399	33.3862	20.1416	16.2354	16.3574	17.2119		20.0195	17.0898	20.874	18.9209	37.5977	18.6768
		26.123	33.5083	20.2637	16.2354	16.3574	17.2119		20.0195	17.2119	20.874	18.9209	38.6963	18.6768
		26.1841	33.5693	20.3857	16.2354	16.3574	17.2119		20.0195	17.2119	20.9961	18.9209	38.6963	18.6768
		26.3061	34.2407	20.5078	16.2354	16.3574	17.2119		20.0195	17.2119	20.9961	19.043	39.1846	18.6768
		26.5503	34.4238	20.5078	16.2354	16.3574	17.2119		20.2637	17.2119	21.1182	19.043	39.7949	18.7988
		26.5503	34.5459	20.752	16.2354	16.4795	17.2119		20.2637	17.2119	21.2402	19.165	41.0156	18.7988
		26.6113	34.9121	20.752	16.3574	16.4795	17.2119		20.3857	17.334	21.2402	19.165	42.2363	18.7988
		26.7334	37.2925	21.1182	16.3574	16.4795	17.334		20.3857	17.334	21.3623	19.165	42.3584	18.7988
		27.0386	40.7715	21.1182	16.3574	16.4795	17.334		20.5078	17.334	21.4844	19.165	42.3584	18.9209
		27.8931	40.9546	21.1182	16.3574	16.4795	17.334		20.5078	17.334	21.6064	19.2871	42.8467	18.9209
		28.1372	41.0767	21.4844	16.3574	16.4795	17.334		20.6299	17.4561	21.6064	19.2871	42.9688	18.9209
		28.1982	41.1987	21.6064	16.3574	16.6016	17.334		20.6299	17.4561	21.7285	19.2871	43.2129	18.9209
		28.3814	42.8467	21.7285	16.3574	16.6016	17.4561		20.752	17.4561	21.7285	19.2871	43.335	19.165
		28.5034	43.0908	21.8506	16.3574	16.6016	17.4561		20.874	17.5781	21.8506	19.2871	43.335	19.165
		28.6255	44.7998	21.9727	16.3574	16.6016	17.4561		20.874	17.7002	22.2168	19.4092	43.457	19.165
		28.6255	44.9219	21.9727	16.4795	16.6016	17.4561		21.1182	17.7002	22.583	19.5312	43.7012	19.165
		29.1748	45.227	22.2168	16.4795	16.6016	17.4561		21.1182	17.7002	22.583	19.5312	44.0674	19.2871
		29.6631	45.2881	22.4609	16.4795	16.6016	17.4561		21.1182	17.7002	22.583	19.5312	44.3115	19.2871
		29.9072	48.0347	22.583	16.4795	16.6016	17.5781		21.1182	17.8223	22.583	19.5312	44.4336	19.5312
		29.9683	49.0112	22.8271	16.4795	16.6016	17.5781		21.1182	17.8223	22.583	19.6533	44.7998	19.6533
		30.0293	50.9033	22.8271	16.4795	16.7236	17.5781		21.1182	17.8223	22.583	19.6533	45.8984	19.7754
		30.6396	51.5747	22.8271	16.6016	16.7236	17.7002		21.2402	17.8223	22.583	19.6533	46.2646	19.7754
		30.7617	54.8096	23.0713	16.6016	16.7236	17.7002		21.2402	17.8223	22.7051	19.6533	46.6309	19.7754
		31.311	54.9927	23.0713	16.6016	16.7236	17.8223		21.2402	17.8223	22.7051	19.7754	47.2412	19.7754
		31.4941	57.6172	23.0713	16.6016	16.8457	17.8223		21.2402	17.8223	22.8271	19.7754	47.7295	19.7754
		31.6772	58.0444	23.1934	16.6016	16.8457	17.8223		21.2402	17.9443	22.8271	19.7754	47.8516	19.7754
		31.6772	64.3311	23.1934	16.7236	16.8457	17.8223		21.3623	17.9443	22.9492	20.1416	47.8516	20.0195
		31.7383	73.4253	23.3154	16.7236	16.8457	17.8223		21.3623	17.9443	22.9492	20.1416	48.2178	20.0195
		32.5317	83.9233	23.9258	16.7236	16.8457	17.8223		21.3623	17.9443	23.3154	20.2637	48.3398	20.0195
		32.959		24.292	16.7236	16.8457	17.8223		21.6064	17.9443	23.4375	20.2637	48.4619	20.0195
		33.2642		24.4141	16.7236	16.8457	17.8223		21.6064	17.9443	23.4375	20.3857	48.4619	20.1416
		33.5083		24.5361	16.7236	16.8457	17.9443		21.6064	18.0664	23.6816	20.3857	49.6826	20.1416
		34.0576		24.7803	16.8457	16.9678	17.9443		21.6064	18.0664	23.9258	20.3857	49.9267	20.2637
		34.729		24.9023	16.8457	16.9678	18.0664		21.7285	18.0664	24.0479	20.5078	50.1709	20.2637
		35.5835		25.3906	16.8457	16.9678	18.0664		21.8506	18.0664	24.1699	20.5078	50.293	20.2637
		35.9497		25.7568	16.8457	16.9678	18.0664		21.8506	18.0664	24.1699	20.6299	50.415	20.2637
		36.8042		26.001	16.8457	16.9678	18.0664		21.8506	18.0664	24.1699	20.6299	50.5371	20.3857
		36.8042		26.6113	16.8457	17.0898	18.0664		21.8506	18.1885	24.1699	20.752	50.5371	20.3857
		36.8652		26.8555	16.8457	17.0898	18.1885		21.8506	18.1885	24.292	20.752	50.6592	20.3857
		37.1094		26.8555	16.8457	17.0898	18.1885		21.9727	18.1885	24.292	20.752	51.0254	20.5078
		38.8794		27.0996	16.9678	17.0898	18.3105		21.9727	18.3105	24.292	20.752	52.2461	20.5078
		38.9404		27.832	16.9678	17.0898	18.3105		21.9727	18.3105	24.292	20.874	52.7344	20.5078
		39.1846		27.832	16.9678	17.0898	18.3105		21.9727	18.3105	24.292	20.874	52.7344	20.5078
		39.6118		27.832	16.9678	17.0898	18.3105		22.0947	18.3105	24.292	20.874	53.9551	20.5078
		39.6118		28.0762	16.9678	17.2119	18.3105		22.0947	18.3105	24.4141	20.9961	53.9551	20.5078
		40.9546		28.0762	16.9678	17.2119	18.3105		22.2168	18.3105	24.4141	20.9961	54.1992	20.5078
		41.2598		28.1982	16.9678	17.2119	18.3105		22.2168	18.4326	24.5361	21.1182	54.4434	20.6299
		41.748		28.6865	16.9678	17.2119	18.4326		22.2168	18.4326	24.6582	21.1182	54.5654	20.6299
		42.1753		29.0527	16.9678	17.2119	18.4326		22.2168	18.4326	24.6582	21.2402	54.6875	20.6299
		42.4194		29.4189	17.0898	17.2119	18.4326		22.2168	18.4326	24.6582	21.2402	54.6875	20.6299
		44.9219		29.6631	17.0898	17.334	18.5547		22.3389	18.4326	24.6582	21.3623	54.8096	20.6299
		46.2036		29.6631	17.0898	17.4561	18.5547		22.3389	18.5547	24.6582	21.3623	55.542	20.6299
		46.7529		30.0293	17.0898	17.4561	18.5547		22.3389	18.5547	24.7803	21.4844	55.6641	20.752
		47.6684		30.5176	17.0898	17.4561	18.5547		22.4609	18.5547	25.0244	21.4844	56.0303	20.752
		48.584		30.6396	17.2119	17.4561	18.5547		22.4609	18.5547	25.0244	21.4844	56.3965	20.874
		49.3164		30.6396	17.2119	17.4561	18.5547		22.4609	18.6768	25.1465	21.6064	56.3965	20.874
		49.7437		31.0059	17.2119	17.4561	18.5547		22.4609	18.6768	25.2686	21.6064	56.8848	20.874
		55.7251		31.1279	17.2119	17.4561	18.6768		22.7051	18.6768	25.3906	21.7285	58.7158	20.874
		55.9692		31.6162	17.2119	17.5781	18.6768		22.7051	18.7988	25.3906	21.7285	58.96	20.9961
		59.2041		31.8604	17.334	17.5781	18.6768		22.7051	18.7988	25.5127	21.7285	59.2041	20.9961
		60.5469		31.8604	17.334	17.5781	18.6768		22.7051	18.7988	25.5127	21.7285	60.5469	20.9961
		63.1103		32.3486	17.334	17.7002	18.7988		22.8271	18.7988	25.6348	21.9727	60.791	20.9961
		63.4155		32.5928	17.334	17.7002	18.7988		22.9492	18.9209	25.7568	21.9727	60.9131	21.1182
		65.4297		32.7148	17.334	17.7002	18.7988		22.9492	18.9209	25.7568	21.9727	61.0352	21.1182
		78.6743		33.081	17.334	17.7002	18.9209		22.9492	18.9209	25.7568	21.9727	61.2793	21.1182
		84.0454		33.081	17.334	17.8223	18.9209		23.0713	18.9209	25.7568	22.0947	61.5234	21.1182
		86.4258		33.2031	17.4561	17.8223	18.9209		23.0713	19.043	25.8789	22.583	61.5234	21.1182
		87.0972		33.4473	17.4561	17.8223	18.9209		23.0713	19.043	26.001	22.583	63.1103	21.2402
		90.3931		33.5693	17.4561	17.8223	18.9209		23.0713	19.043	26.123	22.583	63.5986	21.3623
		93.811		33.8135	17.4561	17.9443	19.043		23.1934	19.043	26.123	22.583	63.8428	21.3623
		95.0928		34.1797	17.4561	17.9443	19.043		23.1934	19.043	26.123	22.583	64.209	21.3623
		100.586		34.79	17.4561	17.9443	19.043		23.1934	19.043	26.2451	22.583	64.3311	21.3623
		113.037		35.5225	17.5781	17.9443	19.043		23.1934	19.165	26.2451	22.7051	64.3311	21.3623
		127.564		35.7666	17.5781	17.9443	19.165		23.1934	19.165	26.3672	22.7051	65.5517	21.3623
		165.466		36.1328	17.5781	17.9443	19.165		23.1934	19.2871	26.3672	22.7051	65.7959	21.4844
				36.1328	17.5781	18.0664	19.165		23.1934	19.2871	26.4893	22.8271	66.1621	21.4844
				36.7432	17.5781	18.0664	19.2871		23.1934	19.4092	26.4893	22.8271	66.2842	21.6064
				36.8652	17.5781	18.1885	19.4092		23.4375	19.4092	26.6113	22.8271	67.2607	21.7285
				37.3535	17.5781	18.1885	19.4092		23.4375	19.4092	26.6113	22.9492	67.2607	21.7285
				37.9639	17.5781	18.1885	19.5312		23.4375	19.4092	26.7334	22.9492	67.3828	21.7285
				37.9639	17.5781	18.1885	19.5312		23.5596	19.4092	26.8555	22.9492	67.6269	21.7285
				38.208	17.5781	18.3105	19.5312		23.5596	19.4092	26.8555	22.9492	68.6035	21.7285
				38.9404	17.5781	18.3105	19.5312		23.5596	19.5312	26.8555	23.0713	71.0449	21.7285
				40.2832	17.5781	18.3105	19.5312		23.5596	19.5312	26.8555	23.0713	71.2891	21.8506
				40.5273	17.7002	18.4326	19.6533		23.6816	19.5312	26.8555	23.1934	71.8994	21.9727
				41.2598	17.7002	18.4326	19.7754		23.6816	19.5312	26.8555	23.1934	72.6318	21.9727
				41.8701	17.7002	18.4326	19.7754		23.6816	19.5312	26.8555	23.3154	72.876	21.9727
				42.2363	17.7002	18.4326	19.8975		23.6816	19.5312	26.9775	23.3154	73.1201	22.0947
				43.2129	17.7002	18.4326	19.8975		23.8037	19.5312	27.0996	23.4375	73.2422	22.0947
				43.5791	17.7002	18.4326	20.0195		23.9258	19.6533	27.0996	23.5596	74.585	22.0947
				44.5557	17.7002	18.5547	20.0195		23.9258	19.6533	27.3438	23.6816	75.0732	22.0947
				45.166	17.7002	18.5547	20.1416		24.0479	19.6533	27.3438	23.6816	76.6602	22.0947
				45.5322	17.7002	18.5547	20.1416		24.0479	19.6533	27.3438	23.6816	77.2705	22.2168
				45.6543	17.7002	18.5547	20.1416		24.1699	19.6533	27.3438	23.6816	77.5146	22.3389
				45.8984	17.8223	18.5547	20.2637		24.1699	19.7754	27.4658	23.6816	77.7588	22.3389
				46.9971	17.8223	18.5547	20.2637		24.1699	19.8975	27.4658	23.8037	78.0029	22.3389
				49.4385	17.8223	18.6768	20.2637		24.1699	19.8975	27.5879	23.8037	79.1016	22.3389
				49.5605	17.8223	18.6768	20.2637		24.292	19.8975	27.5879	23.9258	79.2236	22.4609
				51.6357	17.8223	18.6768	20.2637		24.292	19.8975	27.71	23.9258	79.3457	22.4609
				52.124	17.8223	18.6768	20.3857		24.292	19.8975	27.9541	24.0479	80.0781	22.4609
				52.8564	17.8223	18.6768	20.3857		24.292	19.8975	27.9541	24.0479	81.7871	22.4609
				53.3447	17.8223	18.6768	20.5078		24.292	19.8975	27.9541	24.0479	82.8857	22.583
				54.5654	17.8223	18.7988	20.5078		24.4141	20.0195	28.0762	24.0479	83.6182	22.583
				56.7627	17.8223	18.7988	20.6299		24.4141	20.0195	28.0762	24.1699	85.2051	22.583
				56.7627	17.8223	18.7988	20.752		24.4141	20.0195	28.1982	24.1699	85.4492	22.7051
				57.6172	17.8223	18.7988	20.752		24.4141	20.0195	28.1982	24.292	86.792	22.7051
				57.8613	17.9443	18.7988	20.752		24.5361	20.0195	28.1982	24.292	87.2803	22.8271
				57.9834	17.9443	18.7988	20.874		24.5361	20.1416	28.4424	24.292	88.0127	22.8271
				60.4248	17.9443	18.7988	20.874		24.5361	20.1416	28.4424	24.292	89.3555	22.8271
				61.7676	17.9443	18.9209	20.874		24.5361	20.1416	28.4424	24.292	94.1162	22.9492
				62.7441	17.9443	18.9209	20.874		24.6582	20.1416	28.8086	24.4141	94.4824	23.0713
				66.8945	17.9443	18.9209	20.874		24.6582	20.1416	28.8086	24.4141	96.9238	23.0713
				68.8477	17.9443	19.043	20.9961		24.6582	20.2637	28.8086	24.4141	98.1445	23.0713
				69.5801	17.9443	19.043	21.1182		24.7803	20.2637	28.9307	24.5361	99.9756	23.1934
				69.8242	17.9443	19.043	21.1182		24.7803	20.2637	28.9307	24.5361	99.9756	23.1934
				70.4346	18.0664	19.043	21.1182		24.9023	20.2637	29.0527	24.5361	100.22	23.1934
				73.6084	18.0664	19.043	21.1182		24.9023	20.2637	29.0527	24.5361	100.83	23.1934
				76.5381	18.0664	19.165	21.2402		24.9023	20.2637	29.2969	24.5361	105.347	23.1934
				81.7871	18.0664	19.165	21.2402		24.9023	20.2637	29.2969	24.5361	106.079	23.3154
				85.3271	18.0664	19.165	21.2402		24.9023	20.3857	29.4189	24.5361	107.91	23.3154
				91.1865	18.0664	19.165	21.3623		24.9023	20.3857	29.4189	24.5361	108.276	23.4375
				109.375	18.0664	19.2871	21.3623		25.0244	20.3857	29.541	24.6582	109.009	23.4375
				110.107	18.1885	19.2871	21.3623		25.1465	20.5078	29.541	24.6582	109.009	23.4375
				121.704	18.1885	19.2871	21.3623		25.1465	20.5078	29.541	24.7803	110.23	23.5596
				125.855	18.1885	19.2871	21.3623		25.1465	20.5078	29.541	24.9023	120.361	23.5596
				133.789	18.1885	19.2871	21.3623		25.1465	20.5078	29.6631	24.9023	127.93	23.6816
				138.061	18.1885	19.2871	21.4844		25.1465	20.5078	29.6631	24.9023	185.181	23.6816
				222.412	18.1885	19.4092	21.4844		25.2686	20.6299	29.6631	24.9023		23.6816
				229.614	18.1885	19.4092	21.4844		25.2686	20.6299	29.7852	24.9023		23.8037
					18.1885	19.4092	21.6064		25.2686	20.6299	29.7852	25.0244		23.8037
					18.1885	19.5312	21.6064		25.2686	20.6299	29.7852	25.0244		23.8037
					18.1885	19.5312	21.8506		25.2686	20.6299	30.0293	25.0244		23.8037
					18.1885	19.6533	21.8506		25.3906	20.6299	30.0293	25.0244		23.8037
					18.1885	19.6533	21.8506		25.3906	20.6299	30.1514	25.0244		23.9258
					18.1885	19.6533	21.8506		25.3906	20.6299	30.1514	25.0244		23.9258
					18.1885	19.6533	21.8506		25.5127	20.752	30.2734	25.1465		23.9258
					18.3105	19.6533	21.8506		25.5127	20.752	30.2734	25.1465		23.9258
					18.3105	19.7754	21.9727		25.5127	20.752	30.3955	25.1465		23.9258
					18.3105	19.7754	21.9727		25.5127	20.752	30.6396	25.1465		23.9258
					18.3105	19.7754	21.9727		25.6348	20.874	30.7617	25.3906		23.9258
					18.3105	19.7754	21.9727		25.6348	20.874	30.7617	25.5127		24.0479
					18.3105	19.7754	22.0947		25.7568	20.874	30.7617	25.5127		24.0479
					18.3105	19.7754	22.0947		25.8789	20.874	30.7617	25.6348		24.0479
					18.3105	19.7754	22.0947		25.8789	20.874	30.8838	25.6348		24.0479
					18.3105	19.8975	22.0947		26.001	20.874	30.8838	25.6348		24.1699
					18.3105	19.8975	22.0947		26.001	20.9961	30.8838	25.6348		24.1699
					18.3105	19.8975	22.2168		26.001	20.9961	31.1279	25.7568		24.1699
					18.4326	20.0195	22.2168		26.001	20.9961	31.3721	25.7568		24.292
					18.4326	20.1416	22.2168		26.001	21.1182	31.3721	25.7568		24.4141
					18.4326	20.1416	22.2168		26.001	21.1182	31.4941	25.7568		24.4141
					18.4326	20.2637	22.3389		26.001	21.2402	31.4941	25.8789		24.4141
					18.4326	20.2637	22.3389		26.123	21.2402	31.4941	25.8789		24.5361
					18.4326	20.2637	22.3389		26.123	21.2402	31.6162	25.8789		24.6582
					18.5547	20.2637	22.3389		26.123	21.2402	31.7383	25.8789		24.6582
					18.5547	20.3857	22.3389		26.123	21.2402	31.7383	25.8789		24.7803
					18.5547	20.3857	22.3389		26.123	21.2402	31.7383	26.001		24.7803
					18.5547	20.3857	22.3389		26.123	21.3623	31.9824	26.001		24.7803
					18.5547	20.5078	22.3389		26.2451	21.3623	32.1045	26.001		24.7803
					18.6768	20.5078	22.4609		26.4893	21.3623	32.1045	26.001		24.7803
					18.6768	20.6299	22.4609		26.4893	21.3623	32.1045	26.123		24.7803
					18.6768	20.6299	22.4609		26.4893	21.3623	32.2266	26.123		24.7803
					18.6768	20.6299	22.4609		26.4893	21.4844	32.2266	26.123		24.9023
					18.6768	20.752	22.4609		26.6113	21.4844	32.3486	26.2451		24.9023
					18.6768	20.752	22.583		26.6113	21.4844	32.3486	26.2451		24.9023
					18.7988	20.752	22.583		26.7334	21.4844	32.3486	26.2451		25.0244
					18.7988	20.752	22.583		26.7334	21.6064	32.3486	26.3672		25.0244
					18.7988	20.752	22.7051		26.7334	21.6064	32.4707	26.4893		25.1465
					18.7988	20.752	22.7051		26.8555	21.6064	32.4707	26.4893		25.1465
					18.7988	20.874	22.7051		26.9775	21.6064	32.5928	26.4893		25.2686
					18.7988	20.874	22.7051		26.9775	21.6064	32.7148	26.6113		25.2686
					18.7988	20.874	22.7051		26.9775	21.6064	32.8369	26.6113		25.2686
					18.7988	20.9961	22.7051		26.9775	21.6064	32.8369	26.6113		25.2686
					18.7988	20.9961	22.7051		27.0996	21.7285	32.8369	26.6113		25.2686
					18.7988	20.9961	22.8271		27.0996	21.7285	33.081	26.6113		25.3906
					18.7988	21.1182	22.8271		27.3438	21.7285	33.081	26.7334		25.3906
					18.7988	21.2402	22.8271		27.3438	21.7285	33.081	26.7334		25.3906
					18.9209	21.2402	22.8271		27.4658	21.7285	33.081	26.7334		25.3906
					18.9209	21.2402	22.9492		27.4658	21.8506	33.081	26.7334		25.3906
					18.9209	21.3623	22.9492		27.4658	21.8506	33.3252	26.8555		25.3906
					18.9209	21.3623	22.9492		27.4658	21.9727	33.5693	26.8555		25.3906
					18.9209	21.4844	22.9492		27.4658	21.9727	33.6914	26.9775		25.3906
					18.9209	21.4844	23.0713		27.5879	21.9727	33.8135	26.9775		25.3906
					18.9209	21.6064	23.0713		27.5879	21.9727	33.8135	26.9775		25.3906
					19.043	21.6064	23.0713		27.71	21.9727	33.9355	26.9775		25.5127
					19.043	21.6064	23.0713		27.71	22.0947	33.9355	26.9775		25.6348
					19.043	21.6064	23.0713		27.71	22.0947	33.9355	26.9775		25.7568
					19.043	21.6064	23.1934		27.832	22.0947	33.9355	27.0996		25.7568
					19.043	21.6064	23.1934		28.0762	22.0947	33.9355	27.0996		25.8789
					19.165	21.7285	23.1934		28.0762	22.0947	34.1797	27.0996		25.8789
					19.165	21.7285	23.1934		28.1982	22.0947	34.1797	27.2217		25.8789
					19.165	21.7285	23.3154		28.1982	22.2168	34.3017	27.2217		26.001
					19.165	21.8506	23.3154		28.1982	22.2168	34.3017	27.2217		26.001
					19.165	21.8506	23.4375		28.1982	22.2168	34.4238	27.3438		26.001
					19.165	22.0947	23.4375		28.1982	22.2168	34.4238	27.3438		26.001
					19.165	22.2168	23.4375		28.1982	22.2168	34.5459	27.3438		26.123
					19.165	22.2168	23.4375		28.3203	22.2168	34.668	27.3438		26.2451
					19.2871	22.3389	23.5596		28.4424	22.2168	34.668	27.3438		26.2451
					19.2871	22.3389	23.5596		28.4424	22.2168	34.668	27.4658		26.2451
					19.2871	22.3389	23.5596		28.5645	22.2168	34.79	27.4658		26.3672
					19.2871	22.3389	23.5596		28.6865	22.3389	34.79	27.4658		26.3672
					19.2871	22.4609	23.5596		28.6865	22.3389	34.79	27.4658		26.3672
					19.2871	22.4609	23.6816		28.8086	22.3389	34.9121	27.5879		26.3672
					19.2871	22.583	23.6816		28.9307	22.4609	35.0342	27.5879		26.4893
					19.2871	22.7051	23.6816		28.9307	22.4609	35.4004	27.5879		26.4893
					19.2871	22.7051	23.8037		29.0527	22.4609	35.4004	27.71		26.4893
					19.2871	22.7051	23.8037		29.0527	22.4609	35.6445	27.71		26.6113
					19.4092	22.7051	23.8037		29.0527	22.4609	35.6445	27.832		26.6113
					19.4092	22.8271	23.9258		29.0527	22.4609	35.7666	27.9541		26.7334
					19.4092	22.8271	23.9258		29.0527	22.4609	35.8887	27.9541		26.7334
					19.4092	23.0713	23.9258		29.0527	22.4609	35.8887	28.0762		26.8555
					19.4092	23.1934	24.0479		29.0527	22.583	36.1328	28.0762		26.8555
					19.4092	23.1934	24.0479		29.0527	22.583	36.1328	28.1982		26.9775
					19.4092	23.1934	24.0479		29.1748	22.583	36.2549	28.1982		26.9775
					19.5312	23.3154	24.0479		29.1748	22.7051	36.377	28.3203		27.0996
					19.5312	23.4375	24.0479		29.2969	22.7051	36.377	28.3203		27.0996
					19.5312	23.5596	24.1699		29.2969	22.7051	36.499	28.3203		27.2217
					19.5312	23.8037	24.1699		29.2969	22.7051	36.499	28.3203		27.2217
					19.5312	23.9258	24.292		29.2969	22.7051	36.499	28.5645		27.3438
					19.5312	24.0479	24.292		29.4189	22.7051	36.499	28.5645		27.3438
					19.5312	24.0479	24.4141		29.541	22.7051	36.6211	28.5645		27.4658
					19.5312	24.1699	24.4141		29.541	22.8271	36.6211	28.8086		27.71
					19.5312	24.1699	24.4141		29.6631	22.8271	36.6211	28.9307		27.71
					19.5312	24.1699	24.4141		29.6631	22.8271	36.7432	28.9307		27.71
					19.5312	24.1699	24.4141		29.6631	22.8271	36.7432	28.9307		27.832
					19.6533	24.292	24.4141		29.7852	22.8271	36.8652	29.0527		27.832
					19.6533	24.292	24.5361		29.9072	22.8271	36.8652	29.1748		27.9541
					19.6533	24.4141	24.5361		29.9072	22.9492	36.8652	29.2969		27.9541
					19.6533	24.4141	24.5361		30.0293	22.9492	37.2314	29.2969		27.9541
					19.6533	24.4141	24.6582		30.0293	22.9492	37.3535	29.4189		27.9541
					19.6533	24.5361	24.6582		30.0293	22.9492	37.3535	29.4189		28.0762
					19.7754	24.6582	24.6582		30.1514	22.9492	37.3535	29.541		28.1982
					19.7754	24.9023	24.7803		30.1514	22.9492	37.4756	29.541		28.1982
					19.7754	24.9023	24.9023		30.1514	22.9492	37.4756	29.7852		28.3203
					19.7754	24.9023	24.9023		30.2734	23.0713	37.4756	29.7852		28.3203
					19.7754	24.9023	24.9023		30.2734	23.0713	37.5977	29.7852		28.4424
					19.7754	25.0244	24.9023		30.3955	23.0713	37.5977	29.7852		28.4424
					19.7754	25.1465	24.9023		30.3955	23.0713	37.5977	29.9072		28.4424
					19.7754	25.1465	24.9023		30.3955	23.1934	37.7197	29.9072		28.4424
					19.7754	25.1465	24.9023		30.3955	23.1934	37.7197	29.9072		28.5645
					19.8975	25.2686	25.0244		30.5176	23.1934	37.8418	29.9072		28.5645
					19.8975	25.3906	25.0244		30.5176	23.1934	37.8418	30.0293		28.6865
					19.8975	25.3906	25.0244		30.5176	23.1934	38.0859	30.0293		28.6865
					19.8975	25.6348	25.0244		30.6396	23.3154	38.0859	30.0293		28.8086
					19.8975	25.7568	25.0244		30.6396	23.3154	38.208	30.1514		28.8086
					20.0195	25.7568	25.0244		30.6396	23.3154	38.3301	30.1514		28.8086
					20.0195	25.8789	25.1465		30.7617	23.3154	38.4521	30.2734		28.8086
					20.0195	26.001	25.1465		30.7617	23.3154	38.4521	30.2734		28.8086
					20.0195	26.001	25.1465		30.7617	23.3154	38.5742	30.2734		28.9307
					20.0195	26.001	25.2686		30.8838	23.3154	38.5742	30.3955		28.9307
					20.0195	26.001	25.2686		31.1279	23.3154	38.5742	30.3955		28.9307
					20.0195	26.123	25.3906		31.25	23.3154	38.6963	30.5176		29.0527
					20.1416	26.123	25.3906		31.6162	23.3154	38.6963	30.5176		29.0527
					20.1416	26.2451	25.3906		31.6162	23.3154	38.6963	30.6396		29.1748
					20.1416	26.3672	25.3906		31.6162	23.4375	38.8184	30.6396		29.1748
					20.2637	26.4893	25.3906		31.6162	23.4375	38.8184	30.6396		29.1748
					20.2637	26.4893	25.3906		31.6162	23.4375	38.8184	30.6396		29.1748
					20.2637	26.4893	25.5127		31.8604	23.4375	38.9404	30.6396		29.1748
					20.2637	26.6113	25.5127		31.9824	23.4375	39.0625	30.7617		29.2969
					20.2637	26.7334	25.5127		31.9824	23.5596	39.0625	30.7617		29.2969
					20.2637	26.8555	25.6348		31.9824	23.5596	39.0625	30.8838		29.2969
					20.2637	26.9775	25.6348		31.9824	23.5596	39.1846	30.8838		29.2969
					20.2637	26.9775	25.6348		31.9824	23.5596	39.1846	30.8838		29.4189
					20.3857	27.0996	25.6348		32.1045	23.5596	39.3066	30.8838		29.4189
					20.3857	27.2217	25.6348		32.2266	23.5596	39.3066	30.8838		29.4189
					20.3857	27.2217	25.7568		32.3486	23.5596	39.4287	30.8838		29.541
					20.3857	27.2217	25.7568		32.3486	23.6816	39.5508	30.8838		29.541
					20.3857	27.3438	25.7568		32.4707	23.6816	39.5508	31.0059		29.541
					20.3857	27.5879	25.7568		32.4707	23.6816	39.6728	31.1279		29.7852
					20.5078	27.5879	25.8789		32.4707	23.6816	39.7949	31.1279		29.7852
					20.5078	27.71	25.8789		32.4707	23.6816	39.917	31.1279		29.7852
					20.5078	27.9541	25.8789		32.5928	23.6816	39.917	31.1279		29.7852
					20.5078	27.9541	25.8789		32.5928	23.6816	39.917	31.25		29.9072
					20.5078	28.0762	25.8789		32.7148	23.8037	40.1611	31.25		29.9072
					20.5078	28.0762	26.001		32.7148	23.8037	40.2832	31.25		29.9072
					20.5078	28.0762	26.001		32.8369	23.8037	40.2832	31.3721		30.0293
					20.5078	28.1982	26.001		32.959	23.8037	40.2832	31.3721		30.0293
					20.5078	28.1982	26.4893		33.081	23.8037	40.4053	31.4941		30.0293
					20.5078	28.3203	26.4893		33.081	23.9258	40.6494	31.6162		30.0293
					20.5078	28.4424	26.4893		33.2031	23.9258	40.8935	31.6162		30.1514
					20.5078	28.4424	26.6113		33.2031	23.9258	41.0156	31.6162		30.1514
					20.6299	28.4424	26.6113		33.2031	23.9258	41.1377	31.6162		30.2734
					20.6299	28.4424	26.7334		33.3252	23.9258	41.3818	31.6162		30.2734
					20.6299	28.5645	26.7334		33.4473	23.9258	41.5039	31.6162		30.2734
					20.6299	28.6865	26.7334		33.4473	23.9258	41.5039	31.7383		30.3955
					20.6299	28.6865	26.7334		33.4473	23.9258	41.5039	31.7383		30.5176
					20.6299	28.8086	26.7334		33.5693	23.9258	41.5039	31.7383		30.5176
					20.6299	28.9307	26.8555		33.5693	24.0479	41.626	31.8604		30.5176
					20.6299	28.9307	26.8555		33.6914	24.0479	41.626	31.8604		30.6396
					20.6299	28.9307	26.8555		33.8135	24.0479	41.748	31.8604		30.6396
					20.6299	29.0527	26.8555		33.8135	24.0479	41.748	31.8604		30.6396
					20.752	29.1748	26.8555		33.9355	24.0479	41.8701	31.8604		30.7617
					20.752	29.4189	26.9775		33.9355	24.0479	41.9922	31.9824		30.7617
					20.752	29.4189	26.9775		33.9355	24.0479	41.9922	31.9824		30.7617
					20.752	29.6631	26.9775		34.0576	24.1699	41.9922	31.9824		30.8838
					20.752	29.7852	27.0996		34.1797	24.1699	42.1142	31.9824		30.8838
					20.752	30.2734	27.0996		34.3017	24.1699	42.1142	31.9824		30.8838
					20.752	30.2734	27.0996		34.4238	24.1699	42.2363	32.1045		31.0059
					20.874	30.3955	27.0996		34.4238	24.1699	42.3584	32.1045		31.0059
					20.874	30.5176	27.2217		34.5459	24.292	42.3584	32.2266		31.0059
					20.874	30.6396	27.2217		34.5459	24.292	42.4805	32.2266		31.0059
					20.874	30.7617	27.3438		34.668	24.292	42.4805	32.2266		31.1279
					20.874	30.8838	27.4658		34.668	24.4141	42.4805	32.4707		31.1279
					20.874	31.0059	27.4658		34.668	24.4141	42.6025	32.4707		31.25
					20.874	31.1279	27.4658		34.79	24.4141	42.6025	32.4707		31.25
					20.874	31.3721	27.4658		34.79	24.4141	42.6025	32.4707		31.3721
					20.874	31.3721	27.5879		34.79	24.4141	42.6025	32.5928		31.3721
					20.874	31.4941	27.5879		34.9121	24.4141	42.9688	32.5928		31.4941
					20.874	32.1045	27.5879		35.0342	24.4141	42.9688	32.5928		31.4941
					20.9961	32.2266	27.5879		35.1562	24.4141	42.9688	32.5928		31.6162
					20.9961	32.4707	27.5879		35.1562	24.5361	43.0908	32.5928		31.6162
					20.9961	32.4707	27.5879		35.2783	24.5361	43.2129	32.7148		31.7383
					20.9961	33.081	27.71		35.2783	24.5361	43.2129	32.7148		31.7383
					20.9961	33.081	27.71		35.2783	24.5361	43.2129	32.7148		31.7383
					20.9961	33.081	27.71		35.2783	24.5361	43.2129	32.7148		31.7383
					20.9961	33.2031	27.71		35.2783	24.5361	43.457	32.8369		31.7383
					20.9961	33.5693	27.832		35.2783	24.6582	43.457	32.8369		31.8604
					21.1182	33.6914	27.832		35.4004	24.6582	43.5791	32.959		31.8604
					21.1182	33.9355	27.832		35.4004	24.6582	43.7012	32.959		31.9824
					21.1182	33.9355	27.832		35.4004	24.6582	43.7012	33.081		31.9824
					21.1182	34.0576	27.9541		35.5225	24.6582	43.8232	33.2031		31.9824
					21.1182	34.1797	27.9541		35.6445	24.6582	43.9453	33.2031		31.9824
					21.1182	34.3017	27.9541		35.6445	24.7803	44.0674	33.3252		32.1045
					21.2402	34.4238	27.9541		35.6445	24.7803	44.1895	33.3252		32.1045
					21.2402	34.4238	27.9541		35.7666	24.7803	44.1895	33.3252		32.2266
					21.2402	34.668	27.9541		35.8887	24.7803	44.4336	33.3252		32.3486
					21.2402	35.0342	28.0762		35.8887	24.9023	44.4336	33.3252		32.3486
					21.2402	35.0342	28.0762		36.0107	25.0244	44.4336	33.4473		32.3486
					21.2402	35.1562	28.0762		36.1328	25.0244	44.5557	33.4473		32.5928
					21.3623	35.4004	28.1982		36.2549	25.0244	44.5557	33.6914		32.7148
					21.3623	35.5225	28.1982		36.377	25.0244	44.5557	33.6914		32.7148
					21.3623	35.7666	28.3203		36.377	25.0244	44.5557	33.6914		32.7148
					21.3623	35.7666	28.3203		36.377	25.0244	44.6777	33.6914		32.7148
					21.3623	35.7666	28.4424		36.499	25.0244	44.6777	33.6914		32.7148
					21.3623	35.8887	28.4424		36.499	25.1465	44.7998	33.8135		32.8369
					21.3623	36.1328	28.4424		36.6211	25.1465	44.7998	33.8135		32.8369
					21.3623	36.377	28.5645		36.6211	25.1465	44.7998	33.9355		32.8369
					21.4844	36.7432	28.6865		36.6211	25.1465	44.7998	33.9355		32.8369
					21.4844	36.7432	28.6865		36.6211	25.1465	45.0439	33.9355		32.959
					21.4844	37.2314	28.6865		36.7432	25.1465	45.0439	34.0576		32.959
					21.4844	37.3535	28.8086		36.8652	25.1465	45.0439	34.0576		32.959
					21.4844	38.0859	28.8086		36.9873	25.2686	45.0439	34.0576		32.959
					21.4844	38.0859	28.8086		37.1094	25.2686	45.166	34.0576		32.959
					21.6064	38.208	28.8086		37.2314	25.2686	45.166	34.1797		32.959
					21.6064	38.3301	28.9307		37.3535	25.3906	45.2881	34.1797		33.2031
					21.6064	38.3301	28.9307		37.3535	25.3906	45.5322	34.1797		33.2031
					21.6064	38.5742	28.9307		37.3535	25.3906	45.6543	34.1797		33.4473
					21.7285	39.1846	29.0527		37.4756	25.3906	45.6543	34.1797		33.4473
					21.7285	39.3066	29.1748		37.5977	25.3906	45.6543	34.4238		33.5693
					21.7285	39.3066	29.1748		37.5977	25.3906	45.8984	34.4238		33.5693
					21.7285	39.4287	29.1748		37.7197	25.3906	45.8984	34.4238		33.5693
					21.7285	40.0391	29.2969		37.7197	25.5127	46.0205	34.4238		33.5693
					21.8506	40.0391	29.2969		37.8418	25.5127	46.0205	34.5459		33.5693
					21.8506	40.1611	29.4189		37.8418	25.5127	46.1426	34.5459		33.6914
					21.8506	40.2832	29.4189		37.9639	25.5127	46.1426	34.5459		33.6914
					21.8506	40.4053	29.541		37.9639	25.5127	46.2646	34.5459		33.6914
					21.8506	40.7715	29.6631		38.0859	25.5127	46.3867	34.5459		33.6914
					21.8506	41.0156	29.7852		38.0859	25.5127	46.5088	34.5459		33.6914
					21.8506	41.0156	29.7852		38.208	25.6348	46.5088	34.5459		33.8135
					21.8506	41.0156	29.9072		38.208	25.6348	46.5088	34.668		33.9355
					21.8506	41.3818	29.9072		38.208	25.6348	46.6309	34.668		33.9355
					21.9727	41.748	30.0293		38.208	25.6348	46.7529	34.79		33.9355
					21.9727	41.9922	30.0293		38.208	25.6348	46.9971	34.79		34.0576
					21.9727	42.1142	30.0293		38.208	25.7568	47.2412	34.79		34.0576
					21.9727	42.4805	30.0293		38.3301	25.7568	47.2412	34.79		34.1797
					21.9727	43.335	30.1514		38.3301	25.8789	47.2412	34.9121		34.1797
					21.9727	43.7012	30.1514		38.4521	25.8789	47.4853	34.9121		34.3017
					21.9727	43.8232	30.2734		38.5742	25.8789	47.4853	35.0342		34.3017
					21.9727	43.8232	30.2734		38.5742	25.8789	47.4853	35.1562		34.3017
					21.9727	44.0674	30.3955		38.5742	25.8789	47.4853	35.1562		34.4238
					21.9727	44.0674	30.3955		38.8184	25.8789	47.6074	35.2783		34.4238
					22.0947	44.0674	30.3955		38.8184	25.8789	47.7295	35.2783		34.4238
					22.0947	44.3115	30.3955		38.9404	26.001	47.8516	35.2783		34.5459
					22.2168	44.7998	30.3955		38.9404	26.123	47.9736	35.2783		34.668
					22.2168	44.9219	30.3955		39.0625	26.123	47.9736	35.4004		34.668
					22.2168	45.2881	30.3955		39.1846	26.123	47.9736	35.4004		34.668
					22.2168	45.5322	30.5176		39.3066	26.123	48.0957	35.4004		34.668
					22.2168	45.5322	30.5176		39.4287	26.2451	48.2178	35.4004		34.668
					22.2168	45.8984	30.5176		39.4287	26.2451	48.2178	35.4004		34.79
					22.2168	46.1426	30.5176		39.5508	26.2451	48.2178	35.5225		34.79
					22.3389	46.2646	30.6396		39.6728	26.2451	48.2178	35.5225		34.79
					22.3389	46.5088	30.7617		39.6728	26.2451	48.2178	35.7666		34.9121
					22.3389	47.3633	30.7617		39.7949	26.2451	48.3398	35.7666		34.9121
					22.3389	47.9736	31.1279		39.7949	26.2451	48.3398	35.8887		34.9121
					22.3389	48.2178	31.1279		39.917	26.2451	48.584	36.0107		34.9121
					22.3389	48.706	31.1279		40.0391	26.3672	48.584	36.0107		35.0342
					22.3389	49.4385	31.1279		40.1611	26.3672	48.584	36.1328		35.0342
					22.4609	50.0488	31.1279		40.2832	26.3672	48.706	36.1328		35.0342
					22.4609	50.293	31.1279		40.2832	26.3672	48.706	36.1328		35.1562
					22.4609	51.2695	31.25		40.2832	26.3672	48.706	36.377		35.1562
					22.4609	51.5137	31.3721		40.4053	26.4893	48.8281	36.377		35.4004
					22.4609	52.002	31.3721		40.4053	26.4893	48.9502	36.377		35.4004
					22.4609	52.2461	31.3721		40.4053	26.4893	49.1943	36.377		35.5225
					22.4609	53.1006	31.4941		40.5273	26.4893	49.1943	36.499		35.6445
					22.4609	53.2227	31.4941		40.5273	26.6113	49.3164	36.6211		35.6445
					22.4609	53.4668	31.4941		40.5273	26.6113	49.4385	36.6211		35.6445
					22.583	53.833	31.4941		40.6494	26.6113	49.5605	36.7432		35.6445
					22.583	55.0537	31.6162		40.7715	26.7334	49.5605	36.8652		35.7666
					22.583	55.542	31.6162		40.7715	26.7334	49.5605	36.8652		35.8887
					22.583	58.4717	31.6162		40.7715	26.7334	49.6826	36.8652		35.8887
					22.583	58.7158	31.7383		41.0156	26.7334	49.6826	36.8652		35.8887
					22.7051	59.8145	31.7383		41.0156	26.7334	49.8047	36.9873		35.8887
					22.7051	59.9365	31.8604		41.1377	26.8555	49.8047	37.1094		36.0107
					22.7051	61.2793	31.9824		41.1377	26.8555	50.0488	37.1094		36.0107
					22.7051	61.4014	32.1045		41.1377	26.8555	50.0488	37.2314		36.1328
					22.7051	62.2559	32.1045		41.2598	26.8555	50.0488	37.2314		36.2549
					22.7051	62.5	32.1045		41.2598	26.9775	50.0488	37.2314		36.2549
					22.7051	64.0869	32.2266		41.2598	26.9775	50.1709	37.2314		36.377
					22.7051	64.9414	32.2266		41.2598	26.9775	50.1709	37.2314		36.377
					22.8271	65.918	32.3486		41.3818	26.9775	50.293	37.3535		36.377
					22.8271	67.1387	32.4707		41.3818	26.9775	50.293	37.3535		36.499
					22.8271	67.9932	32.4707		41.3818	26.9775	50.415	37.3535		36.499
					22.8271	69.9463	32.4707		41.5039	27.0996	50.415	37.4756		36.499
					22.8271	71.167	32.4707		41.5039	27.0996	50.415	37.5977		36.499
					22.8271	71.8994	32.4707		41.5039	27.0996	50.6592	37.5977		36.6211
					22.8271	74.2187	32.5928		41.5039	27.2217	50.6592	37.5977		36.6211
					22.9492	75.3174	32.7148		41.626	27.2217	50.7812	37.7197		36.8652
					22.9492	76.7822	32.7148		41.626	27.2217	50.7812	37.7197		36.8652
					22.9492	80.0781	32.7148		41.748	27.2217	50.7812	37.7197		36.9873
					22.9492	85.083	32.8369		41.748	27.2217	51.0254	37.8418		36.9873
					22.9492	85.3271	32.959		41.748	27.2217	51.1475	37.9639		36.9873
					22.9492	90.6982	32.959		41.8701	27.3438	51.3916	37.9639		37.1094
					22.9492	92.5293	32.959		41.8701	27.3438	51.5137	37.9639		37.1094
					22.9492	93.8721	32.959		41.8701	27.3438	51.5137	37.9639		37.1094
					23.0713	98.5107	32.959		41.9922	27.3438	51.6357	37.9639		37.3535
					23.0713	102.295	33.081		41.9922	27.4658	51.6357	38.0859		37.3535
					23.0713	134.766	33.081		41.9922	27.4658	52.002	38.0859		37.3535
					23.0713	150.268	33.081		42.1142	27.4658	52.002	38.208		37.4756
					23.0713	162.598	33.081		42.2363	27.4658	52.124	38.208		37.5977
					23.0713	164.795	33.2031		42.2363	27.4658	52.124	38.3301		37.7197
					23.0713	206.055	33.3252		42.2363	27.4658	52.2461	38.4521		37.7197
					23.0713		33.3252		42.3584	27.5879	52.3682	38.4521		37.9639
					23.0713		33.3252		42.3584	27.5879	52.4902	38.4521		38.0859
					23.1934		33.5693		42.3584	27.5879	52.4902	38.4521		38.208
					23.1934		33.6914		42.3584	27.71	52.4902	38.5742		38.208
					23.1934		33.6914		42.4805	27.71	52.6123	38.5742		38.208
					23.1934		33.6914		42.6025	27.71	52.6123	38.5742		38.3301
					23.1934		33.6914		42.6025	27.71	52.6123	38.6963		38.3301
					23.1934		33.6914		42.7246	27.71	52.7344	38.6963		38.3301
					23.1934		33.6914		42.8467	27.832	52.7344	38.8184		38.3301
					23.1934		33.8135		42.8467	27.832	52.8564	38.8184		38.4521
					23.1934		33.8135		42.9688	27.832	52.8564	38.8184		38.4521
					23.3154		33.8135		42.9688	27.832	52.8564	38.9404		38.4521
					23.3154		33.9355		43.457	27.832	52.8564	38.9404		38.5742
					23.3154		34.1797		43.5791	27.9541	53.1006	38.9404		38.5742
					23.4375		34.1797		43.5791	27.9541	53.2227	39.0625		38.5742
					23.4375		34.3017		43.7012	27.9541	53.3447	39.0625		38.6963
					23.4375		34.3017		43.7012	27.9541	53.3447	39.0625		38.8184
					23.4375		34.5459		43.8232	27.9541	53.4668	39.0625		38.8184
					23.4375		34.5459		43.8232	27.9541	53.4668	39.1846		38.9404
					23.5596		34.668		43.8232	27.9541	53.7109	39.1846		38.9404
					23.5596		34.9121		43.9453	27.9541	53.833	39.1846		39.0625
					23.5596		34.9121		43.9453	28.0762	53.9551	39.3066		39.0625
					23.6816		35.2783		44.0674	28.0762	54.1992	39.3066		39.3066
					23.6816		35.2783		44.0674	28.0762	54.1992	39.4287		39.3066
					23.6816		35.2783		44.0674	28.1982	54.1992	39.4287		39.4287
					23.6816		35.4004		44.1895	28.1982	54.3213	39.4287		39.4287
					23.6816		35.5225		44.1895	28.1982	54.4434	39.5508		39.4287
					23.8037		35.5225		44.1895	28.1982	54.5654	39.5508		39.6728
					23.8037		35.6445		44.3115	28.1982	54.5654	39.6728		39.6728
					23.8037		35.6445		44.5557	28.1982	54.6875	39.7949		39.7949
					23.8037		35.7666		44.5557	28.1982	54.6875	39.7949		39.7949
					23.9258		35.8887		44.5557	28.1982	54.6875	39.7949		39.7949
					23.9258		35.8887		44.6777	28.1982	54.8096	39.7949		39.917
					23.9258		35.8887		44.9219	28.1982	54.8096	39.7949		39.917
					23.9258		35.8887		44.9219	28.1982	54.9316	39.917		40.0391
					23.9258		36.0107		44.9219	28.3203	55.0537	39.917		40.0391
					23.9258		36.0107		44.9219	28.3203	55.0537	39.917		40.1611
					23.9258		36.1328		45.2881	28.3203	55.2978	40.0391		40.1611
					24.0479		36.2549		45.2881	28.3203	55.2978	40.0391		40.2832
					24.0479		36.377		45.4102	28.3203	55.4199	40.0391		40.5273
					24.0479		36.377		45.4102	28.3203	55.4199	40.0391		40.6494
					24.0479		36.7432		45.5322	28.3203	55.7861	40.1611		40.6494
					24.0479		37.1094		45.5322	28.4424	55.7861	40.1611		40.6494
					24.0479		37.2314		45.5322	28.4424	56.0303	40.2832		40.6494
					24.0479		37.2314		45.6543	28.4424	56.1523	40.4053		40.7715
					24.1699		37.3535		45.7764	28.4424	56.1523	40.6494		40.7715
					24.1699		37.3535		45.7764	28.4424	56.1523	40.7715		40.8935
					24.1699		37.4756		45.7764	28.4424	56.1523	40.7715		40.8935
					24.1699		37.5977		45.8984	28.4424	56.3965	40.8935		41.0156
					24.292		37.7197		45.8984	28.4424	56.3965	40.8935		41.0156
					24.292		37.7197		46.0205	28.4424	56.5185	41.0156		41.0156
					24.292		37.8418		46.2646	28.5645	56.6406	41.0156		41.0156
					24.292		37.8418		46.3867	28.5645	56.8848	41.2598		41.1377
					24.4141		37.8418		46.3867	28.5645	57.1289	41.2598		41.1377
					24.4141		37.9639		46.5088	28.5645	57.1289	41.2598		41.2598
					24.4141		38.0859		46.5088	28.5645	57.1289	41.2598		41.2598
					24.4141		38.0859		46.5088	28.5645	57.373	41.5039		41.2598
					24.5361		38.0859		46.6309	28.6865	57.373	41.626		41.5039
					24.5361		38.3301		46.875	28.6865	57.4951	41.626		41.5039
					24.5361		38.3301		46.875	28.6865	57.6172	41.626		41.5039
					24.5361		38.3301		46.9971	28.6865	57.6172	41.626		41.626
					24.5361		38.4521		47.1191	28.6865	57.8613	41.748		41.748
					24.5361		38.4521		47.6074	28.6865	57.8613	41.748		41.9922
					24.6582		38.5742		47.8516	28.8086	57.8613	41.748		41.9922
					24.6582		38.8184		47.8516	28.8086	57.9834	41.748		41.9922
					24.6582		38.8184		48.0957	28.8086	57.9834	41.748		42.1142
					24.7803		38.9404		48.2178	28.8086	57.9834	41.8701		42.1142
					24.7803		39.1846		48.2178	28.8086	58.1055	41.8701		42.2363
					24.7803		39.3066		48.4619	28.9307	58.3496	41.8701		42.3584
					24.7803		39.5508		48.4619	28.9307	58.3496	41.8701		42.4805
					24.7803		39.6728		48.584	28.9307	58.4717	41.9922		42.6025
					24.9023		39.6728		48.584	28.9307	58.7158	42.3584		42.6025
					24.9023		39.917		48.584	28.9307	58.7158	42.3584		42.7246
					24.9023		40.1611		48.706	29.0527	58.8379	42.4805		42.7246
					24.9023		40.1611		48.706	29.0527	58.8379	42.6025		42.7246
					24.9023		40.1611		48.706	29.0527	58.8379	42.6025		42.8467
					24.9023		40.2832		48.9502	29.0527	59.2041	42.7246		42.9688
					24.9023		40.4053		48.9502	29.0527	59.2041	42.7246		42.9688
					25.0244		40.4053		49.0723	29.1748	59.3262	42.8467		42.9688
					25.0244		40.4053		49.0723	29.1748	59.4482	42.8467		43.0908
					25.0244		40.4053		49.3164	29.1748	59.4482	42.8467		43.2129
					25.0244		40.6494		49.5605	29.1748	59.5703	42.9688		43.2129
					25.0244		40.7715		49.6826	29.1748	59.5703	42.9688		43.335
					25.0244		40.8935		49.6826	29.1748	59.5703	42.9688		43.457
					25.0244		40.8935		49.6826	29.1748	59.6924	42.9688		43.5791
					25.1465		41.0156		49.9267	29.1748	59.6924	42.9688		43.7012
					25.1465		41.1377		49.9267	29.2969	59.6924	42.9688		43.8232
					25.1465		41.3818		49.9267	29.2969	59.8145	42.9688		43.8232
					25.1465		41.5039		49.9267	29.2969	60.0586	43.2129		43.9453
					25.1465		41.626		49.9267	29.2969	60.1807	43.7012		44.0674
					25.2686		41.748		50.0488	29.2969	60.4248	43.7012		44.0674
					25.2686		41.748		50.0488	29.2969	60.4248	43.8232		44.0674
					25.2686		41.9922		50.0488	29.2969	60.4248	43.9453		44.4336
					25.2686		41.9922		50.1709	29.4189	60.4248	43.9453		44.4336
					25.2686		42.3584		50.293	29.4189	60.5469	43.9453		44.4336
					25.2686		42.3584		50.293	29.4189	60.5469	44.0674		44.4336
					25.3906		42.4805		50.293	29.4189	60.6689	44.0674		44.4336
					25.5127		42.4805		50.293	29.4189	60.6689	44.1895		44.5557
					25.5127		42.7246		50.415	29.4189	60.791	44.1895		44.6777
					25.5127		42.8467		51.1475	29.4189	60.9131	44.1895		44.9219
					25.5127		42.9688		51.1475	29.541	61.0352	44.3115		45.0439
					25.5127		43.2129		51.1475	29.541	61.1572	44.3115		45.0439
					25.5127		43.2129		51.2695	29.541	61.4014	44.3115		45.166
					25.6348		43.2129		51.3916	29.541	61.4014	44.4336		45.166
					25.6348		43.335		51.5137	29.541	61.5234	44.5557		45.5322
					25.7568		43.5791		51.5137	29.541	61.5234	44.7998		45.5322
					25.7568		43.7012		51.8799	29.6631	61.6455	44.7998		45.5322
					25.7568		43.7012		52.2461	29.6631	61.7676	44.9219		45.6543
					25.7568		43.8232		52.4902	29.7852	61.7676	44.9219		45.7764
					25.7568		44.0674		52.4902	29.7852	61.8896	45.0439		45.7764
					25.7568		44.1895		52.6123	29.7852	62.0117	45.0439		45.7764
					25.7568		44.1895		52.8564	29.7852	62.0117	45.166		45.8984
					25.8789		44.3115		52.9785	29.7852	62.0117	45.2881		46.3867
					25.8789		44.6777		52.9785	29.7852	62.5	45.2881		46.5088
					25.8789		44.7998		53.2227	29.9072	62.7441	45.2881		46.5088
					26.001		45.0439		53.3447	29.9072	62.7441	45.2881		46.7529
					26.001		45.166		53.3447	29.9072	62.8662	45.2881		46.7529
					26.001		45.166		53.3447	30.0293	63.2324	45.5322		46.9971
					26.001		45.4102		53.5889	30.0293	63.5986	45.5322		46.9971
					26.123		45.7764		53.5889	30.0293	63.8428	45.6543		47.1191
					26.123		45.8984		53.5889	30.0293	63.8428	45.6543		47.3633
					26.123		45.8984		53.9551	30.1514	63.9648	45.6543		47.6074
					26.123		46.0205		54.0771	30.1514	63.9648	45.7764		47.8516
					26.123		46.2646		54.1992	30.1514	63.9648	45.8984		48.0957
					26.123		46.3867		54.3213	30.1514	63.9648	45.8984		48.0957
					26.2451		46.875		54.3213	30.2734	64.4531	45.8984		48.3398
					26.2451		46.875		54.4434	30.2734	64.5752	46.0205		48.4619
					26.2451		47.1191		54.5654	30.3955	64.8193	46.0205		48.584
					26.2451		47.3633		54.6875	30.3955	64.8193	46.0205		48.8281
					26.2451		47.9736		54.6875	30.3955	64.8193	46.0205		48.8281
					26.2451		47.9736		54.8096	30.3955	64.8193	46.0205		48.8281
					26.3672		48.0957		54.8096	30.3955	65.0635	46.2646		48.8281
					26.3672		48.2178		55.0537	30.3955	65.0635	46.2646		48.8281
					26.4893		48.2178		55.1758	30.5176	65.3076	46.3867		48.8281
					26.4893		48.3398		55.4199	30.5176	65.5517	46.5088		48.8281
					26.4893		48.3398		55.542	30.5176	66.04	46.6309		48.9502
					26.4893		48.584		55.6641	30.5176	66.04	46.6309		49.1943
					26.6113		48.584		55.6641	30.5176	66.04	46.7529		49.3164
					26.6113		48.584		55.7861	30.5176	66.04	46.7529		49.5605
					26.6113		48.9502		55.7861	30.5176	66.1621	46.9971		49.5605
					26.7334		49.0723		55.7861	30.5176	66.1621	46.9971		49.6826
					26.7334		49.0723		55.9082	30.6396	66.1621	46.9971		49.8047
					26.7334		49.4385		56.0303	30.6396	66.2842	46.9971		49.8047
					26.8555		49.8047		56.2744	30.6396	66.5283	47.1191		49.9267
					26.8555		50.0488		56.2744	30.6396	66.7725	47.2412		49.9267
					26.9775		50.415		56.6406	30.7617	66.7725	47.2412		49.9267
					26.9775		50.5371		56.8848	30.7617	66.8945	47.3633		50.0488
					26.9775		50.7812		57.0068	30.7617	67.0166	47.3633		50.1709
					27.0996		50.7812		57.1289	30.7617	67.0166	47.3633		50.1709
					27.0996		51.2695		57.251	30.7617	67.0166	47.4853		50.1709
					27.0996		51.3916		57.4951	30.7617	67.5049	47.4853		50.1709
					27.0996		51.5137		57.8613	30.7617	67.6269	47.4853		50.293
					27.0996		51.6357		58.2275	30.7617	67.6269	47.6074		50.415
					27.0996		51.7578		58.2275	30.8838	67.6269	47.6074		50.415
					27.2217		52.124		58.8379	30.8838	67.749	47.7295		50.5371
					27.2217		52.124		59.2041	30.8838	67.749	47.7295		50.6592
					27.2217		52.2461		59.2041	31.1279	67.8711	47.8516		50.6592
					27.2217		52.6123		59.3262	31.1279	67.9932	47.9736		50.7812
					27.2217		52.7344		59.4482	31.1279	68.2373	47.9736		50.9033
					27.2217		52.7344		59.6924	31.1279	68.2373	47.9736		51.0254
					27.2217		52.8564		59.6924	31.1279	68.3594	48.0957		51.1475
					27.2217		52.8564		59.8145	31.1279	68.4814	48.0957		51.6357
					27.3438		53.3447		60.0586	31.25	68.7256	48.2178		51.8799
					27.3438		54.1992		60.1807	31.25	68.8477	48.2178		51.8799
					27.3438		54.4434		60.1807	31.25	68.8477	48.2178		51.8799
					27.3438		54.6875		60.4248	31.25	68.9697	48.2178		52.2461
					27.3438		55.4199		60.4248	31.25	69.2139	48.3398		52.2461
					27.3438		56.0303		60.5469	31.3721	69.3359	48.3398		52.3682
					27.3438		56.7627		60.5469	31.3721	69.3359	48.4619		52.3682
					27.4658		56.7627		61.0352	31.3721	69.5801	48.4619		52.4902
					27.4658		57.9834		61.1572	31.3721	69.8242	48.4619		52.7344
					27.4658		58.4717		61.1572	31.3721	69.8242	48.584		52.7344
					27.4658		59.8145		61.2793	31.3721	70.0683	48.584		52.9785
					27.4658		61.1572		61.2793	31.3721	70.0683	48.584		53.1006
					27.4658		61.2793		61.5234	31.4941	70.1904	48.584		53.1006
					27.4658		62.3779		62.0117	31.4941	70.3125	48.584		53.1006
					27.5879		62.8662		62.3779	31.4941	70.9228	48.706		53.3447
					27.5879		62.8662		62.3779	31.6162	70.9228	48.706		53.3447
					27.5879		63.1103		62.6221	31.6162	70.9228	48.8281		53.4668
					27.5879		63.5986		62.6221	31.6162	71.0449	48.8281		53.4668
					27.5879		64.209		62.7441	31.7383	71.167	48.8281		53.5889
					27.71		67.2607		62.7441	31.7383	71.5332	48.8281		53.833
					27.71		69.3359		62.9883	31.7383	71.7773	48.9502		53.9551
					27.832		69.9463		62.9883	31.7383	71.7773	48.9502		54.5654
					27.832		74.707		62.9883	31.7383	71.8994	49.0723		54.9316
					27.832		78.6133		63.1103	31.7383	72.0215	49.0723		55.1758
					27.9541		84.9609		63.3545	31.8604	72.2656	49.0723		55.6641
					27.9541		89.2334		63.4766	31.8604	72.3877	49.0723		55.6641
					27.9541		96.0693		63.8428	31.8604	72.876	49.0723		55.6641
					27.9541		108.398		64.209	31.9824	73.4863	49.0723		55.6641
					28.0762		109.375		64.3311	31.9824	73.6084	49.1943		55.7861
					28.0762		130.371		64.3311	31.9824	73.7305	49.1943		56.0303
					28.0762		167.481		64.5752	31.9824	73.9746	49.3164		56.2744
					28.1982		181.03		64.6973	31.9824	74.0967	49.3164		56.2744
					28.1982		206.909		64.6973	31.9824	74.2187	49.4385		56.3965
					28.1982		216.919		64.8193	31.9824	74.4629	49.5605		56.7627
					28.1982		217.773		64.9414	31.9824	74.4629	49.6826		56.7627
					28.3203				65.3076	32.1045	74.8291	49.6826		57.1289
					28.3203				65.4297	32.1045	74.9512	49.6826		57.1289
					28.3203				65.7959	32.1045	75.6836	49.6826		57.251
					28.4424				66.04	32.1045	75.8057	49.9267		57.373
					28.4424				66.1621	32.2266	76.0498	49.9267		57.4951
					28.5645				66.6504	32.2266	76.5381	50.0488		57.7392
					28.5645				66.7725	32.2266	76.5381	50.1709		57.7392
					28.5645				67.0166	32.2266	76.7822	50.415		57.8613
					28.5645				67.1387	32.2266	76.9043	50.415		57.8613
					28.5645				67.2607	32.2266	77.1484	50.415		57.9834
					28.5645				67.5049	32.2266	77.2705	50.5371		58.2275
					28.5645				67.6269	32.3486	77.2705	50.5371		58.4717
					28.5645				68.1152	32.4707	77.2705	50.6592		58.7158
					28.5645				68.3594	32.4707	77.2705	50.6592		58.8379
					28.8086				68.3594	32.4707	77.5146	50.7812		58.96
					28.8086				68.3594	32.4707	77.5146	50.7812		59.082
					28.8086				68.4814	32.4707	77.5146	51.0254		59.082
					28.9307				68.7256	32.4707	77.6367	51.0254		59.2041
					28.9307				68.7256	32.4707	77.8808	51.0254		59.3262
					29.0527				68.7256	32.4707	78.0029	51.0254		59.4482
					29.0527				68.8477	32.4707	78.125	51.1475		59.5703
					29.1748				69.2139	32.4707	78.4912	51.2695		59.6924
					29.1748				69.7021	32.4707	78.6133	51.2695		59.9365
					29.1748				69.8242	32.4707	78.6133	51.3916		60.0586
					29.1748				70.0683	32.5928	78.8574	51.3916		60.0586
					29.1748				70.1904	32.5928	78.9795	51.3916		60.6689
					29.2969				70.1904	32.5928	78.9795	51.5137		60.791
					29.2969				70.4346	32.5928	78.9795	51.6357		61.0352
					29.2969				70.8008	32.5928	79.4678	51.7578		61.1572
					29.2969				71.0449	32.7148	79.7119	51.7578		61.2793
					29.2969				71.0449	32.7148	79.9561	51.8799		61.2793
					29.2969				71.2891	32.7148	79.9561	52.002		61.4014
					29.2969				71.5332	32.7148	80.3223	52.002		61.4014
					29.4189				71.5332	32.7148	80.6885	52.124		61.8896
					29.4189				71.7773	32.7148	80.8105	52.124		62.1338
					29.4189				72.1436	32.7148	80.9326	52.2461		62.1338
					29.4189				72.5098	32.7148	80.9326	52.3682		62.3779
					29.4189				72.5098	32.7148	81.0547	52.4902		62.3779
					29.4189				72.998	32.7148	81.543	52.4902		62.5
					29.541				73.1201	32.8369	81.7871	52.4902		62.6221
					29.541				73.2422	32.8369	81.9092	52.4902		63.3545
					29.541				73.2422	32.8369	82.3975	52.6123		63.5986
					29.541				73.3642	32.8369	83.1299	52.6123		63.9648
					29.6631				73.4863	32.959	83.1299	52.6123		63.9648
					29.6631				74.2187	32.959	83.2519	52.7344		64.209
					29.6631				74.8291	32.959	83.6182	52.7344		64.3311
					29.6631				75.3174	32.959	83.8623	52.7344		64.4531
					29.6631				75.6836	33.081	84.1064	52.7344		64.4531
					29.7852				76.5381	33.081	84.1064	52.9785		64.4531
					29.7852				76.6602	33.081	84.2285	52.9785		64.5752
					29.7852				76.9043	33.2031	84.4727	52.9785		64.6973
					29.9072				77.0264	33.2031	84.7168	52.9785		64.9414
					29.9072				77.2705	33.2031	84.7168	53.2227		64.9414
					29.9072				77.6367	33.2031	84.8389	53.3447		64.9414
					29.9072				77.7588	33.2031	85.083	53.4668		65.0635
					29.9072				78.0029	33.2031	85.5713	53.5889		65.6738
					30.0293				79.1016	33.2031	85.9375	53.7109		66.1621
					30.0293				79.4678	33.3252	86.3037	53.833		66.2842
					30.0293				79.4678	33.3252	86.3037	53.9551		67.0166
					30.0293				79.5898	33.3252	86.4258	53.9551		67.2607
					30.1514				79.7119	33.3252	86.6699	54.1992		67.3828
					30.1514				80.3223	33.4473	86.9141	54.3213		67.5049
					30.1514				80.4443	33.4473	87.0361	54.4434		67.5049
					30.1514				81.2988	33.4473	87.1582	54.4434		67.6269
					30.1514				81.4209	33.4473	87.2803	54.5654		67.6269
					30.1514				82.2754	33.4473	87.4023	54.5654		67.9932
					30.1514				82.3975	33.5693	87.5244	54.5654		68.1152
					30.2734				83.0078	33.5693	87.7686	54.6875		68.1152
					30.2734				83.374	33.5693	87.7686	54.6875		68.3594
					30.2734				83.7402	33.5693	88.2568	54.6875		69.2139
					30.2734				83.7402	33.5693	88.7451	54.6875		69.3359
					30.3955				84.3506	33.5693	88.7451	54.8096		69.3359
					30.3955				84.4727	33.5693	88.9892	54.8096		69.8242
					30.3955				84.7168	33.5693	89.1113	54.8096		69.9463
					30.3955				85.083	33.6914	89.7217	55.0537		70.8008
					30.3955				85.083	33.6914	89.7217	55.2978		71.2891
					30.3955				85.3271	33.6914	90.21	55.2978		71.4111
					30.5176				86.4258	33.8135	90.21	55.2978		71.8994
					30.5176				86.792	33.8135	90.332	55.542		72.0215
					30.6396				86.9141	33.8135	90.4541	55.6641		72.1436
					30.6396				87.0361	33.8135	90.4541	55.6641		72.7539
					30.6396				87.4023	33.8135	90.4541	55.6641		73.6084
					30.6396				87.4023	33.8135	90.5762	55.7861		74.2187
					30.6396				87.7686	33.9355	90.6982	55.7861		74.2187
					30.7617				88.0127	33.9355	90.8203	55.9082		74.707
					30.7617				88.0127	33.9355	91.4307	56.0303		74.707
					30.8838				88.2568	33.9355	91.5527	56.1523		75.8057
					31.0059				88.2568	33.9355	91.6748	56.2744		76.5381
					31.0059				88.501	34.0576	91.6748	56.2744		77.8808
					31.1279				90.332	34.0576	91.9189	56.5185		78.0029
					31.1279				91.5527	34.0576	92.041	56.7627		78.9795
					31.1279				91.9189	34.0576	92.4072	57.1289		78.9795
					31.1279				92.5293	34.1797	92.5293	57.6172		79.2236
					31.1279				93.3838	34.1797	92.5293	57.8613		79.2236
					31.1279				93.8721	34.1797	92.7734	57.8613		79.4678
					31.25				95.2148	34.1797	93.3838	57.9834		79.5898
					31.25				95.3369	34.1797	93.3838	57.9834		79.7119
					31.25				95.3369	34.1797	93.75	58.1055		79.834
					31.25				97.29	34.3017	94.1162	58.2275		80.0781
					31.25				97.4121	34.3017	94.7266	58.2275		80.3223
					31.3721				98.0225	34.4238	95.5811	58.2275		80.5664
					31.3721				98.3887	34.4238	95.8252	58.4717		81.543
					31.4941				98.5107	34.4238	95.9473	58.4717		82.3975
					31.4941				98.7549	34.5459	95.9473	58.4717		83.1299
					31.4941				99.3652	34.5459	95.9473	58.7158		83.1299
					31.4941				99.8535	34.5459	96.0693	58.8379		83.2519
					31.4941				101.318	34.668	96.8017	59.082		83.6182
					31.4941				103.76	34.668	97.168	59.082		83.9844
					31.4941				103.76	34.668	97.29	59.3262		84.1064
					31.6162				104.981	34.668	98.0225	59.4482		84.1064
					31.6162				105.103	34.668	98.3887	59.4482		84.4727
					31.6162				105.713	34.668	98.5107	59.4482		84.5947
					31.6162				106.201	34.668	98.5107	59.4482		84.7168
					31.7383				107.056	34.79	98.6328	59.5703		84.9609
					31.7383				108.643	34.9121	98.7549	59.5703		84.9609
					31.8604				111.939	34.9121	98.8769	59.8145		85.6933
					31.8604				111.939	35.0342	99.2432	59.8145		87.1582
					31.8604				112.305	35.0342	99.4873	59.8145		87.2803
					31.8604				115.478	35.1562	99.4873	60.1807		88.3789
					31.9824				117.432	35.1562	99.8535	60.4248		88.501
					31.9824				118.286	35.2783	100.22	60.5469		88.7451
					32.2266				118.408	35.2783	100.342	60.5469		89.5996
					32.2266				118.53	35.2783	101.685	60.6689		90.332
					32.2266				122.925	35.2783	101.929	60.791		90.4541
					32.2266				123.047	35.2783	102.051	60.791		91.6748
					32.3486				123.779	35.4004	102.417	60.791		92.4072
					32.3486				126.099	35.4004	102.539	60.9131		92.7734
					32.4707				132.202	35.4004	102.905	61.0352		93.0176
					32.4707				138.55	35.4004	103.516	61.0352		93.0176
					32.4707				140.503	35.5225	103.882	61.0352		93.8721
					32.4707				144.653	35.5225	104.126	61.1572		93.9941
					32.4707				145.142	35.5225	104.248	61.1572		95.3369
					32.4707				151.733	35.5225	104.37	61.2793		95.3369
					32.5928				155.395	35.5225	104.858	61.5234		95.7031
					32.5928				160.889	35.5225	105.225	61.5234		95.7031
					32.7148				164.673	35.7666	105.591	61.6455		95.9473
					32.7148				166.138	35.7666	106.567	61.7676		96.3135
					32.8369				173.34	35.8887	106.567	61.7676		96.6797
					32.8369				177.612	35.8887	106.811	61.7676		98.7549
					32.959				178.223	36.0107	107.422	61.8896		99.6094
					32.959				178.833	36.1328	108.276	62.0117		99.7314
					32.959				182.129	36.1328	109.009	62.1338		100.098
					32.959				183.716	36.1328	109.131	62.1338		102.783
					32.959				184.692	36.2549	109.497	62.2559		104.126
					32.959				186.523	36.2549	109.863	62.3779		104.981
					32.959				186.645	36.2549	110.596	62.5		110.23
					32.959				186.645	36.2549	110.596	62.5		116.211
					32.959				199.707	36.377	110.962	62.5		116.455
					33.081				215.454	36.377	112.549	62.5		116.577
					33.081				227.661	36.377	112.671	62.6221		121.704
					33.081				242.676	36.499	113.037	62.7441		122.314
					33.2031				249.512	36.499	113.159	62.9883		123.291
					33.3252					36.499	113.769	62.9883		127.564
					33.3252					36.499	114.258	63.2324		128.174
					33.4473					36.499	114.502	63.3545		132.446
					33.4473					36.6211	115.601	63.3545		139.404
					33.4473					36.6211	116.699	63.3545		142.456
					33.5693					36.6211	117.798	63.4766		143.555
					33.5693					36.6211	118.652	63.5986
					33.6914					36.7432	119.263	63.5986
					33.6914					36.7432	120.239	63.7207
					33.6914					36.7432	120.606	64.0869
					33.6914					36.7432	121.338	64.0869
					33.8135					36.7432	122.314	64.0869
					33.8135					36.8652	123.413	64.209
					33.8135					36.8652	123.779	64.209
					33.8135					36.8652	125.122	64.209
					33.8135					36.8652	126.221	64.4531
					33.8135					36.8652	127.564	64.5752
					33.8135					36.9873	129.517	64.6973
					33.9355					37.1094	129.883	64.9414
					33.9355					37.1094	132.202	64.9414
					33.9355					37.1094	133.911	65.0635
					33.9355					37.2314	135.498	65.1855
					34.0576					37.2314	136.231	65.1855
					34.0576					37.2314	137.695	65.3076
					34.0576					37.2314	138.184	65.5517
					34.0576					37.3535	138.916	65.5517
					34.0576					37.3535	139.77	65.6738
					34.0576					37.4756	140.625	65.6738
					34.1797					37.4756	140.869	65.918
					34.1797					37.4756	143.066	66.04
					34.1797					37.4756	144.775	66.04
					34.1797					37.5977	147.217	66.04
					34.1797					37.5977	151.123	66.1621
					34.1797					37.7197	153.442	66.1621
					34.3017					37.7197	153.931	66.2842
					34.3017					37.7197	157.715	66.2842
					34.3017					37.7197	161.011	66.2842
					34.3017					37.8418	162.598	66.2842
					34.3017					37.8418	165.893	66.4062
					34.3017					37.8418	186.768	66.5283
					34.3017					37.9639	212.402	66.7725
					34.3017					37.9639	220.581	67.2607
					34.3017					37.9639		67.2607
					34.4238					37.9639		67.5049
					34.4238					37.9639		67.5049
					34.4238					38.0859		67.749
					34.5459					38.0859		67.749
					34.5459					38.0859		67.8711
					34.5459					38.208		67.8711
					34.5459					38.208		67.9932
					34.79					38.208		68.1152
					34.79					38.3301		68.2373
					34.79					38.3301		68.4814
					34.9121					38.3301		68.7256
					34.9121					38.3301		68.9697
					34.9121					38.3301		69.0918
					35.0342					38.3301		69.0918
					35.0342					38.4521		69.7021
					35.0342					38.4521		69.7021
					35.1562					38.4521		69.9463
					35.2783					38.4521		70.0683
					35.2783					38.4521		70.1904
					35.4004					38.5742		70.3125
					35.4004					38.5742		70.5566
					35.4004					38.5742		70.6787
					35.5225					38.5742		70.8008
					35.6445					38.5742		70.9228
					35.6445					38.6963		70.9228
					35.6445					38.6963		71.2891
					35.7666					38.8184		71.4111
					35.7666					38.8184		71.5332
					35.8887					38.8184		71.7773
					35.8887					38.8184		71.7773
					35.8887					38.9404		71.8994
					36.0107					38.9404		72.0215
					36.0107					39.0625		72.1436
					36.0107					39.0625		72.2656
					36.0107					39.0625		72.3877
					36.0107					39.0625		72.7539
					36.1328					39.0625		72.876
					36.1328					39.1846		72.876
					36.1328					39.1846		72.998
					36.2549					39.1846		73.1201
					36.2549					39.1846		73.3642
					36.377					39.1846		73.3642
					36.377					39.3066		73.4863
					36.377					39.3066		73.6084
					36.377					39.3066		73.6084
					36.377					39.3066		73.6084
					36.499					39.3066		73.8525
					36.499					39.4287		73.9746
					36.499					39.4287		74.4629
					36.6211					39.4287		74.8291
					36.7432					39.4287		75.4394
					36.7432					39.5508		75.4394
					36.7432					39.5508		75.5615
					36.7432					39.5508		75.5615
					36.7432					39.5508		75.9277
					36.8652					39.6728		75.9277
					36.8652					39.7949		75.9277
					36.8652					39.7949		76.9043
					36.9873					39.7949		77.1484
					36.9873					39.917		77.1484
					36.9873					40.0391		77.6367
					37.1094					40.0391		77.6367
					37.1094					40.0391		77.8808
					37.1094					40.0391		78.0029
					37.2314					40.1611		78.0029
					37.3535					40.1611		78.3691
					37.4756					40.2832		78.9795
					37.4756					40.2832		79.5898
					37.4756					40.2832		79.5898
					37.4756					40.2832		79.834
					37.5977					40.4053		79.9561
					37.5977					40.5273		80.0781
					37.5977					40.5273		80.5664
					37.7197					40.5273		80.5664
					37.7197					40.5273		80.6885
					37.7197					40.6494		80.8105
					37.7197					40.6494		81.0547
					37.7197					40.6494		81.1767
					37.7197					40.6494		81.4209
					37.8418					40.7715		81.9092
					37.8418					40.7715		82.0312
					37.8418					40.8935		82.2754
					37.9639					40.8935		82.3975
					38.0859					40.8935		82.5195
					38.0859					40.8935		82.7637
					38.0859					40.8935		82.8857
					38.0859					40.8935		83.1299
					38.0859					40.8935		83.2519
					38.0859					41.0156		83.4961
					38.208					41.0156		84.1064
					38.3301					41.1377		84.1064
					38.3301					41.1377		84.2285
					38.3301					41.1377		84.5947
					38.3301					41.2598		84.7168
					38.4521					41.3818		85.6933
					38.4521					41.3818		86.0596
					38.4521					41.3818		86.4258
					38.4521					41.3818		86.6699
					38.4521					41.3818		86.6699
					38.5742					41.5039		86.9141
					38.5742					41.626		87.1582
					38.5742					41.626		87.4023
					38.6963					41.626		87.4023
					38.6963					41.626		87.5244
					38.8184					41.748		87.8906
					38.8184					41.748		88.0127
					38.9404					41.748		88.623
					38.9404					41.748		88.9892
					39.0625					41.748		89.3555
					39.0625					41.748		89.3555
					39.0625					41.8701		89.4775
					39.0625					41.8701		89.4775
					39.1846					41.9922		90.0879
					39.1846					41.9922		90.21
					39.1846					41.9922		91.1865
					39.1846					41.9922		91.3086
					39.1846					42.1142		91.6748
					39.1846					42.1142		92.041
					39.1846					42.1142		93.5058
					39.3066					42.1142		93.9941
					39.3066					42.1142		94.2383
					39.4287					42.2363		94.2383
					39.4287					42.2363		94.3603
					39.4287					42.2363		95.7031
					39.4287					42.2363		96.1914
					39.5508					42.3584		96.5576
					39.5508					42.3584		97.0459
					39.6728					42.3584		98.1445
					39.6728					42.3584		98.999
					39.6728					42.4805		99.3652
					39.7949					42.4805		99.8535
					39.7949					42.4805		101.196
					39.917					42.4805		101.318
					39.917					42.4805		102.051
					39.917					42.4805		102.661
					39.917					42.4805		102.783
					40.0391					42.6025		103.272
					40.1611					42.6025		104.126
					40.1611					42.7246		104.248
					40.1611					42.7246		104.981
					40.2832					42.8467		108.032
					40.2832					42.8467		109.985
					40.2832					42.8467		111.206
					40.4053					42.8467		112.793
					40.4053					42.8467		115.112
					40.4053					42.8467		135.62
					40.4053					42.9688		137.329
					40.4053					42.9688		141.113
					40.5273					42.9688		151.733
					40.5273					42.9688		193.848
					40.6494					43.0908
					40.6494					43.0908
					40.6494					43.0908
					40.6494					43.0908
					40.7715					43.0908
					40.8935					43.0908
					41.0156					43.2129
					41.0156					43.2129
					41.1377					43.2129
					41.1377					43.335
					41.1377					43.335
					41.2598					43.335
					41.2598					43.335
					41.2598					43.335
					41.2598					43.335
					41.3818					43.457
					41.3818					43.5791
					41.3818					43.5791
					41.626					43.5791
					41.626					43.5791
					41.626					43.5791
					41.748					43.7012
					41.748					43.7012
					41.8701					43.9453
					41.8701					43.9453
					41.8701					43.9453
					42.2363					44.0674
					42.2363					44.0674
					42.2363					44.0674
					42.3584					44.0674
					42.3584					44.1895
					42.3584					44.1895
					42.4805					44.1895
					42.4805					44.3115
					42.4805					44.3115
					42.7246					44.4336
					42.7246					44.4336
					42.8467					44.5557
					42.8467					44.5557
					42.9688					44.5557
					43.2129					44.5557
					43.2129					44.6777
					43.457					44.7998
					43.5791					44.9219
					43.5791					44.9219
					43.7012					44.9219
					43.7012					45.0439
					43.7012					45.0439
					43.8232					45.166
					43.8232					45.166
					43.8232					45.166
					43.9453					45.166
					43.9453					45.166
					44.1895					45.2881
					44.3115					45.4102
					44.3115					45.4102
					44.4336					45.4102
					44.4336					45.5322
					44.5557					45.5322
					44.5557					45.5322
					44.5557					45.6543
					44.5557					45.7764
					44.6777					45.7764
					44.6777					45.7764
					44.6777					45.7764
					44.7998					45.7764
					44.7998					45.7764
					44.7998					45.8984
					45.0439					45.8984
					45.0439					46.0205
					45.166					46.0205
					45.166					46.0205
					45.166					46.0205
					45.2881					46.1426
					45.2881					46.1426
					45.4102					46.2646
					45.5322					46.2646
					45.6543					46.3867
					45.7764					46.3867
					45.7764					46.3867
					45.8984					46.6309
					46.0205					46.6309
					46.0205					46.6309
					46.0205					46.6309
					46.1426					46.6309
					46.1426					46.7529
					46.1426					46.875
					46.2646					46.9971
					46.2646					46.9971
					46.2646					46.9971
					46.3867					46.9971
					46.3867					46.9971
					46.5088					46.9971
					46.5088					47.1191
					46.5088					47.2412
					46.7529					47.2412
					46.7529					47.3633
					46.7529					47.3633
					46.875					47.3633
					46.9971					47.3633
					46.9971					47.3633
					47.1191					47.3633
					47.1191					47.3633
					47.2412					47.4853
					47.3633					47.6074
					47.6074					47.6074
					47.6074					47.6074
					47.8516					47.7295
					47.8516					47.7295
					47.9736					47.7295
					48.2178					47.8516
					48.3398					47.8516
					48.4619					47.9736
					48.4619					47.9736
					48.584					48.0957
					48.584					48.0957
					48.584					48.0957
					48.8281					48.0957
					48.8281					48.2178
					48.8281					48.2178
					48.9502					48.3398
					49.1943					48.3398
					49.1943					48.3398
					49.5605					48.4619
					49.6826					48.4619
					49.6826					48.584
					49.9267					48.584
					49.9267					48.706
					50.5371					48.706
					50.5371					48.8281
					50.7812					48.8281
					51.2695					48.8281
					51.3916					48.8281
					51.6357					48.9502
					51.8799					49.0723
					52.2461					49.0723
					52.2461					49.0723
					52.2461					49.1943
					52.2461					49.1943
					52.3682					49.3164
					52.3682					49.5605
					52.4902					49.5605
					52.4902					49.6826
					52.7344					49.8047
					52.7344					49.9267
					52.8564					49.9267
					53.1006					49.9267
					53.4668					49.9267
					53.7109					49.9267
					53.833					49.9267
					53.9551					50.0488
					54.1992					50.415
					54.1992					50.415
					54.1992					50.415
					54.3213					50.415
					54.5654					50.5371
					54.9316					50.5371
					55.4199					50.5371
					55.9082					50.5371
					56.1523					50.5371
					56.2744					50.6592
					56.3965					50.7812
					56.5185					50.7812
					56.6406					50.7812
					57.4951					50.9033
					57.7392					50.9033
					58.1055					50.9033
					58.3496					50.9033
					58.7158					51.0254
					58.8379					51.0254
					58.96					51.0254
					58.96					51.1475
					59.4482					51.1475
					60.5469					51.1475
					61.0352					51.1475
					61.1572					51.2695
					61.2793					51.3916
					61.4014					51.5137
					61.7676					51.5137
					62.5					51.6357
					62.5					51.6357
					62.7441					51.6357
					62.8662					51.6357
					63.3545					51.6357
					63.4766					51.7578
					63.4766					51.7578
					63.7207					51.7578
					63.7207					51.8799
					64.3311					52.002
					64.4531					52.124
					64.6973					52.124
					65.1855					52.124
					66.04					52.2461
					66.8945					52.2461
					67.1387					52.2461
					67.6269					52.3682
					68.4814					52.3682
					68.4814					52.3682
					69.0918					52.4902
					69.458					52.4902
					69.7021					52.8564
					71.0449					52.8564
					71.2891					52.8564
					71.4111					52.9785
					71.5332					53.1006
					71.5332					53.1006
					72.6318					53.1006
					73.3642					53.1006
					73.8525					53.1006
					74.2187					53.2227
					74.9512					53.2227
					76.1719					53.4668
					77.1484					53.4668
					77.2705					53.5889
					79.2236					53.5889
					80.6885					53.5889
					80.6885					53.9551
					81.543					54.0771
					82.7637					54.0771
					83.4961					54.1992
					83.4961					54.1992
					84.1064					54.3213
					84.1064					54.3213
					84.2285					54.3213
					103.516					54.3213
					107.056					54.5654
					109.863					54.5654
					110.352					54.8096
					110.718					54.9316
					113.403					54.9316
					122.314					54.9316
					123.657					54.9316
					124.878					54.9316
					124.878					55.0537
					149.902					55.0537
					180.908					55.2978
					188.721					55.2978
					206.909					55.2978
					228.638					55.4199
					233.887					55.542
										55.542
										55.6641
										55.7861
										56.1523
										56.2744
										56.2744
										56.5185
										56.6406
										56.6406
										56.7627
										56.7627
										56.7627
										56.8848
										56.8848
										57.0068
										57.0068
										57.0068
										57.0068
										57.0068
										57.251
										57.373
										57.373
										57.7392
										57.8613
										57.8613
										57.9834
										58.1055
										58.3496
										58.3496
										58.4717
										58.4717
										58.8379
										58.8379
										58.96
										58.96
										59.2041
										59.3262
										59.3262
										59.4482
										59.6924
										59.6924
										59.9365
										60.0586
										60.0586
										60.1807
										60.3027
										60.4248
										60.5469
										60.6689
										60.6689
										60.6689
										60.791
										60.791
										61.2793
										61.4014
										61.4014
										61.4014
										61.5234
										61.5234
										61.7676
										61.8896
										61.8896
										61.8896
										62.1338
										62.3779
										62.3779
										62.6221
										62.6221
										62.7441
										62.7441
										62.7441
										62.7441
										63.1103
										63.3545
										63.5986
										63.5986
										63.7207
										63.9648
										63.9648
										64.0869
										64.3311
										64.3311
										64.4531
										64.8193
										64.8193
										64.9414
										64.9414
										65.0635
										65.0635
										65.0635
										65.1855
										65.1855
										65.3076
										65.5517
										65.6738
										65.6738
										65.7959
										65.918
										66.04
										66.1621
										66.2842
										66.4062
										66.5283
										66.5283
										66.5283
										66.7725
										66.7725
										66.8945
										67.0166
										67.2607
										67.3828
										67.3828
										67.6269
										67.6269
										67.6269
										67.8711
										68.1152
										68.2373
										68.9697
										68.9697
										69.0918
										69.2139
										69.3359
										69.3359
										69.458
										69.5801
										69.7021
										69.7021
										69.8242
										70.8008
										71.0449
										71.7773
										71.8994
										72.3877
										72.6318
										72.7539
										72.876
										72.876
										73.1201
										73.1201
										73.3642
										73.7305
										73.9746
										74.2187
										74.2187
										74.585
										74.9512
										75.3174
										76.7822
										77.0264
										77.2705
										77.6367
										77.6367
										77.7588
										78.4912
										78.4912
										78.6133
										79.2236
										79.3457
										79.834
										80.3223
										81.1767
										81.1767
										81.2988
										81.543
										83.4961
										83.9844
										85.083
										85.2051
										85.6933
										86.4258
										87.6465
										87.7686
										90.5762
										90.6982
										93.1396
										96.6797
										101.44
										104.248
										105.103
										105.225
										111.45
										113.037
										113.892
										122.192
										125.366
										129.272
										223.999
										248.413
