# Supplementary figures and images for: A class-specific effect of dysmyelination on the excitability of hippocampal interneurons
Source: eLife journal article supplement (doi:10.7554/elife.86469), 2023-10-16

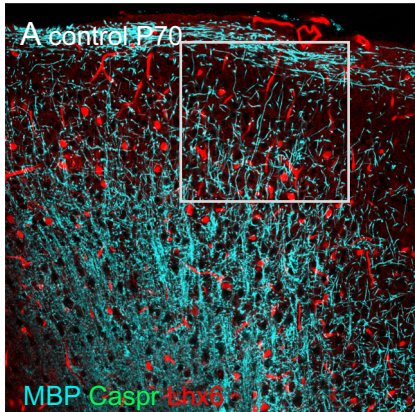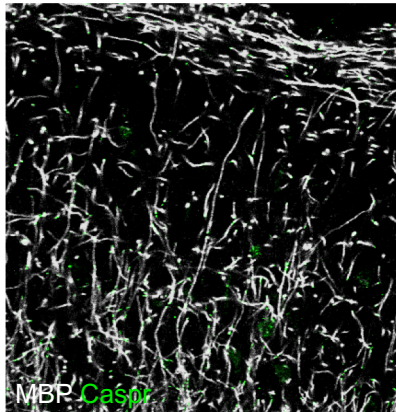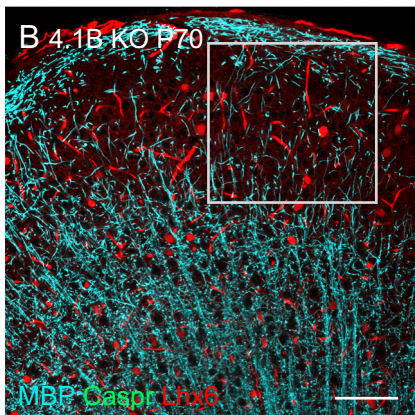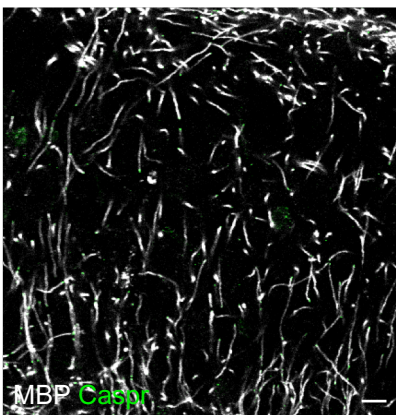

Figure 1-figure supplement 2

Supplement: supp [file elife-86469-supp-v1.zip]

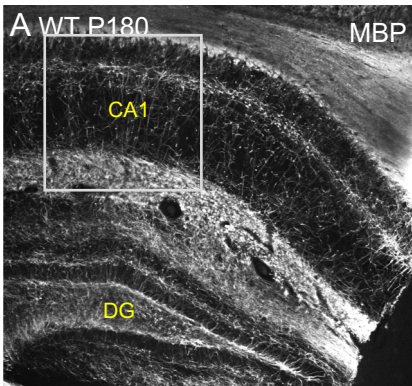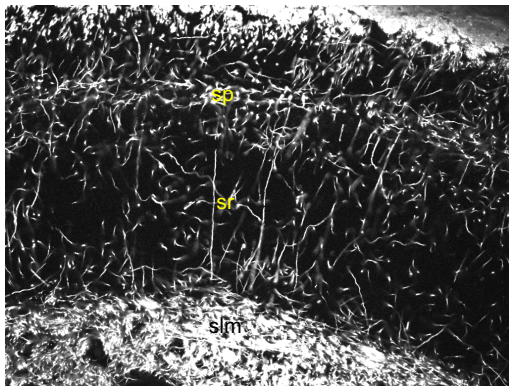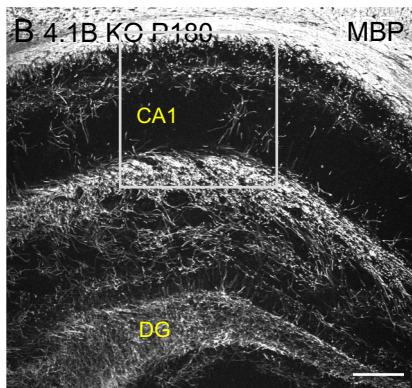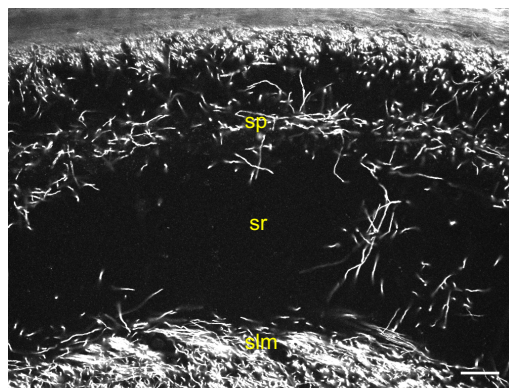

**Figure 1-figure supplement 4**

Supplement: supp [file elife-86469-supp-v1.zip]

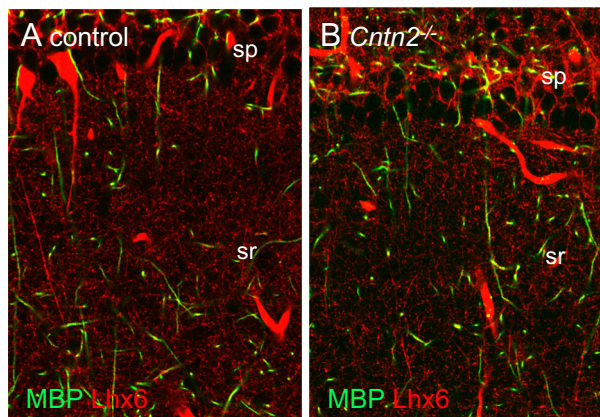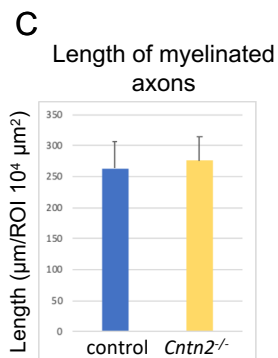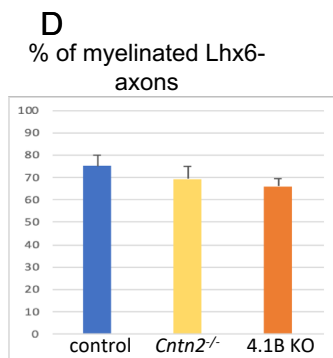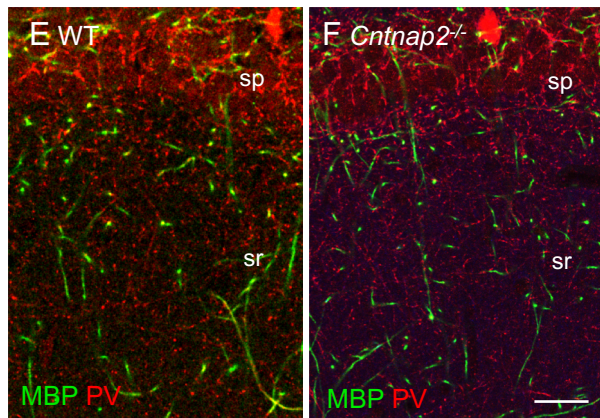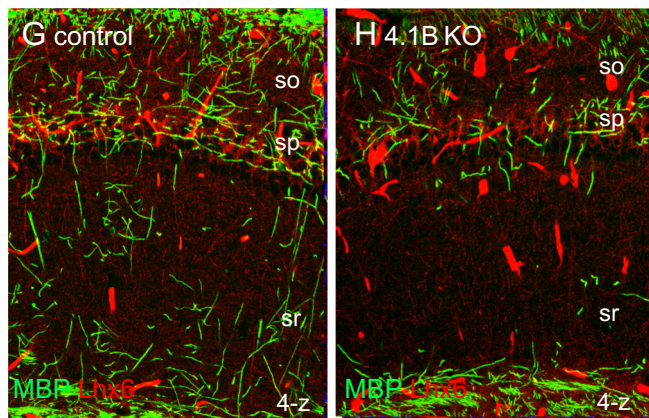

**Figure 1-figure supplement 1**

Supplement: supp [file elife-86469-supp-v1.zip]

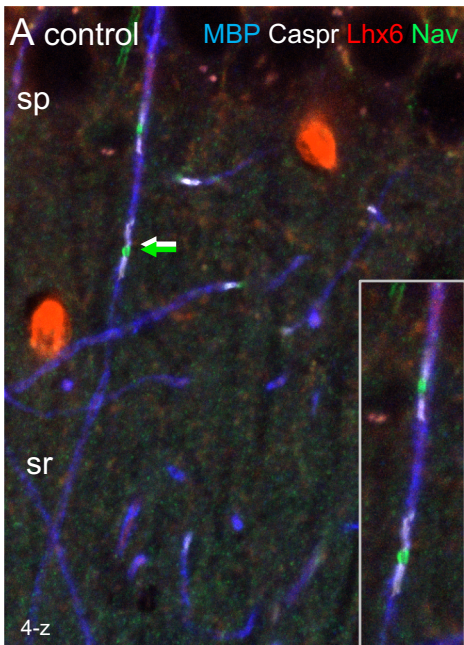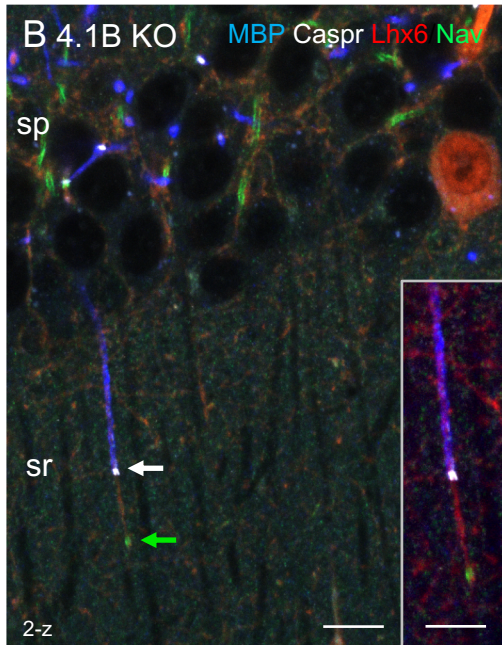

**Figure 5-figure supplement 1**

Supplement: supp [file elife-86469-supp-v1.zip]

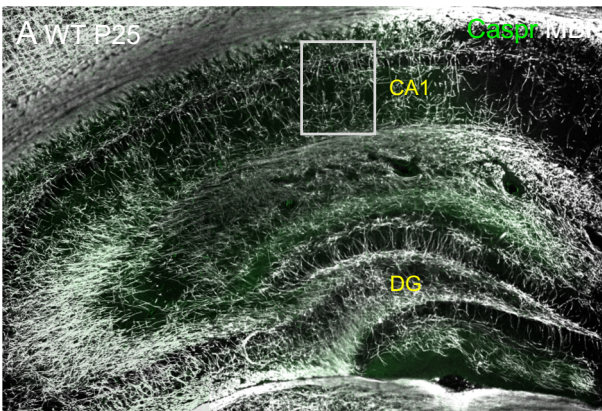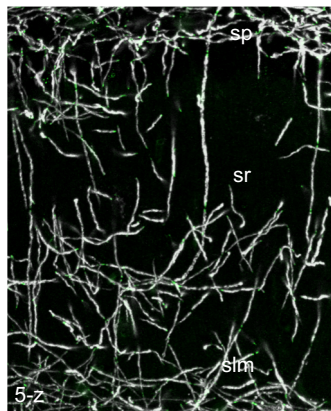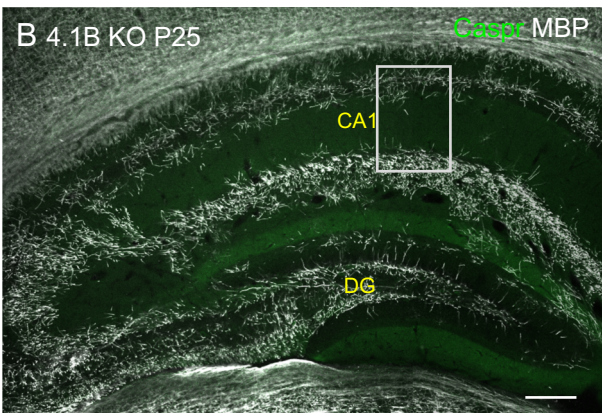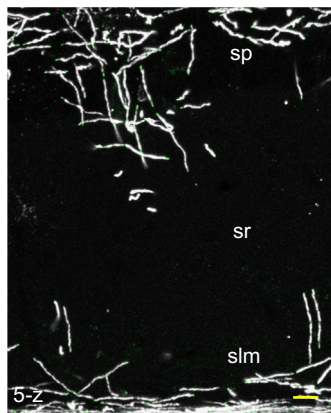

Figure 1-figure supplement 3

Supplement: supp [file elife-86469-supp-v1.zip]
